# Supplementary material for: A simple topology-based model for predicting the activation barriers of reactive processes at 0 K
Source: Royal Society of Chemistry journal article supplement (doi:10.1039/d3cp01008b), 2023-01-01
Supplement: d3cp01008b1.pdf [file d3cp01008b1.pdf]

Electronic Supplementary Information

**A Simple Topology-based Model for Predicting Activation Barriers of  
Reactive Processes at 0 K**

Leandro Ayarde-Henríquez,<sup>\*ab</sup> Cristian Guerra,<sup>c</sup> Mario Duque-Noreña<sup>c</sup> and Eduardo Chamorro<sup>\*c</sup>

<sup>a</sup>School of Physics, Trinity College Dublin, College Green Dublin 2, Ireland.

<sup>b</sup>Centro de Química Teórica & Computacional (CQT&C), Departamento de Ciencias Químicas, Avenida República 275, 8370146, Santiago de Chile. Chile.

<sup>c</sup>Facultad de Ciencias Exactas, Centro de Química Teórica & Computacional (CQT&C), Departamento de Ciencias Químicas, Universidad Andrés Bello, Avenida República 275, 8370146, Santiago de Chile. Chile.

Correspondence to: [leandro.ayarde@tcd.ie](mailto:leandro.ayarde@tcd.ie) (L A-H), [echamorro@unab.cl](mailto:echamorro@unab.cl) (EC)

Contents

**Optimized Cartesian coordinates for minima and transition state structures associated with reactions listed in Table 1 of the manuscript ..... 1**

**Optimized Cartesian coordinates for minima and transition state structures associated with reactions listed in Table 3 of the manuscript ..... 38**

**Values of the external parameter  $\mu$  for the testing reaction set presented in Table 3 of the manuscript ..... 91**

**Optimized Cartesian coordinates for minima and transition state structures associated with reactions listed in Table 1 of the manuscript.**

System 1 (U $\omega$ B97X-D/6-311+G(d,p))

Reactant

|   |             |             |             |
|---|-------------|-------------|-------------|
| C | 0.10204700  | -0.76956400 | -0.79893300 |
| C | 1.39761900  | -0.60432500 | -0.56983900 |
| H | -0.42651100 | -0.17521900 | -1.53684400 |
| H | -0.48292100 | -1.50585500 | -0.25781300 |
| H | 1.92501000  | -1.19811200 | 0.16963500  |
| H | 1.98148800  | 0.13355200  | -1.11037400 |

|   |             |            |            |
|---|-------------|------------|------------|
| C | -1.39981500 | 1.28297500 | 1.27822000 |
| H | -0.86746700 | 2.07029900 | 0.76359800 |
| H | -2.40989600 | 1.03072900 | 0.98573900 |
| H | -0.90862600 | 0.72709100 | 2.06424700 |

Product

|   |             |             |             |
|---|-------------|-------------|-------------|
| C | -0.29083200 | -0.32977500 | -0.35991700 |
| C | 1.19552300  | -0.40503900 | -0.36755900 |
| H | -0.65456700 | -0.04375600 | -1.35282000 |
| H | -0.71279000 | -1.31641400 | -0.13971400 |
| H | 1.72254700  | -1.04874200 | 0.32778400  |
| H | 1.78394100  | 0.29218100  | -0.95342900 |
| C | -0.83833700 | 0.67779800  | 0.67085700  |
| H | -0.46956300 | 1.68601200  | 0.46482400  |
| H | -1.93152000 | 0.70218100  | 0.64392200  |
| H | -0.52811600 | 0.40741500  | 1.68357600  |

Transition state

|   |             |             |             |
|---|-------------|-------------|-------------|
| C | 0.48981100  | 0.64583900  | 0.00003700  |
| C | 1.38508200  | -0.36927100 | -0.00001100 |
| H | 0.24590600  | 1.16492000  | 0.92016400  |
| H | 0.24606200  | 1.16523600  | -0.91995500 |
| H | 1.73486000  | -0.81448400 | -0.92491500 |
| H | 1.73469000  | -0.81470200 | 0.92485300  |
| C | -1.62981400 | -0.23785000 | -0.00002800 |
| H | -1.61132100 | -0.80675200 | 0.92140900  |
| H | -2.20912800 | 0.67917000  | 0.00057900  |
| H | -1.61154200 | -0.80569600 | -0.92212000 |

System 2 (B3LYP/6-31G(d,p))

Reactant

|   |             |             |             |
|---|-------------|-------------|-------------|
| C | -1.18972800 | 0.33737500  | -0.47836500 |
| C | -0.07409800 | 1.18308700  | -1.02852500 |
| C | 0.62062500  | 0.92230000  | -2.13583400 |
| C | -0.90604800 | -0.19998000 | 0.94725800  |
| C | 0.22286000  | -1.19285200 | 0.99524400  |
| C | 1.34831900  | -1.05136900 | 1.69532200  |
| H | -1.38738200 | -0.50367900 | -1.15610300 |
| H | -2.11390600 | 0.93276500  | -0.43856800 |
| H | 0.17224800  | 2.07404200  | -0.44727500 |
| H | 1.41917200  | 1.57480600  | -2.47892500 |
| H | 0.41705600  | 0.04334600  | -2.74463100 |
| H | -0.69114200 | 0.63989000  | 1.62120400  |
| H | -1.82589400 | -0.67449800 | 1.31994400  |
| H | 0.08633400  | -2.09098600 | 0.38939200  |
| H | 2.12902900  | -1.80736900 | 1.68510300  |
| H | 1.53336000  | -0.17116900 | 2.30821900  |

Product

|   |             |             |             |
|---|-------------|-------------|-------------|
| C | -1.34838700 | 1.05097500  | -1.69552300 |
| C | -0.22293200 | 1.19264200  | -0.99547700 |
| C | 0.90602300  | 0.19983200  | -0.94731000 |
| C | -0.62054600 | -0.92190400 | 2.13603600  |
| C | 0.07416100  | -1.18287700 | 1.02876000  |
| C | 1.18974800  | -0.33722900 | 0.47841500  |
| H | -1.53339000 | 0.17065100  | -2.30825400 |
| H | -2.12913200 | 1.80694100  | -1.68544300 |
| H | -0.08644400 | 2.09089600  | -0.38979500 |
| H | 1.82584200  | 0.67432000  | -1.32010200 |
| H | 0.69114800  | -0.64018100 | -1.62108800 |
| H | -0.41699500 | -0.04282600 | 2.74466100  |
| H | -1.41906000 | -1.57437400 | 2.47927000  |

|   |             |             |            |
|---|-------------|-------------|------------|
| H | -0.17216500 | -2.07395200 | 0.44768700 |
| H | 2.11394900  | -0.93259000 | 0.43872000 |
| H | 1.38737900  | 0.50396700  | 1.15598200 |

Transition state

|   |             |             |             |
|---|-------------|-------------|-------------|
| C | 0.95080100  | 1.21801500  | -0.25476600 |
| C | 1.43198800  | -0.00041000 | 0.25999400  |
| C | 0.94984600  | -1.21898300 | -0.25373300 |
| C | -0.94978500 | 1.21885700  | 0.25482700  |
| C | -1.43195400 | 0.00083100  | -0.26012000 |
| C | -0.95104700 | -1.21813600 | 0.25376200  |
| H | 0.81392500  | 1.29909900  | -1.33164100 |
| H | 1.31286200  | 2.14470800  | 0.19025700  |
| H | 1.82458400  | -0.00001600 | 1.27738700  |
| H | 1.30979900  | -2.14559800 | 0.19318000  |
| H | 0.81426800  | -1.30145800 | -1.33068800 |
| H | -0.81303800 | 1.29965600  | 1.33173600  |
| H | -1.31044200 | 2.14606900  | -0.19022600 |
| H | -1.82416200 | 0.00161600  | -1.27766400 |
| H | -1.31132700 | -2.14473700 | -0.19287300 |
| H | -0.81556100 | -1.30037600 | 1.33075100  |

System 3 (M06-2X/6-31+G(d))

Reactant

|   |             |             |             |
|---|-------------|-------------|-------------|
| C | -2.81962200 | -0.79453500 | 0.57670300  |
| C | -2.71986300 | -1.05959200 | -0.74069000 |
| C | -2.57391800 | 0.20321500  | -1.47648900 |
| C | -2.58620600 | 1.22895700  | -0.60226200 |
| H | -2.93571200 | -1.51651900 | 1.37716500  |
| H | -2.73941100 | -2.04196100 | -1.20083800 |

|   |             |             |             |
|---|-------------|-------------|-------------|
| H | -2.47598000 | 0.28048000  | -2.55407600 |
| H | -2.50627500 | 2.28388900  | -0.83930600 |
| C | 0.57982600  | -0.61795300 | 0.68572500  |
| C | 0.65245900  | 0.51073500  | -0.01963300 |
| C | -2.75174600 | 0.69063400  | 0.79035500  |
| H | -3.66202700 | 1.07663700  | 1.27094800  |
| H | -1.91074800 | 0.96875200  | 1.44195700  |
| C | 0.52026300  | -1.98773400 | 0.06825600  |
| O | 2.11701300  | 2.35490500  | 0.64193500  |
| O | 1.68828100  | -2.74408900 | 0.32891600  |
| C | 2.69315500  | 2.50939500  | -0.63277400 |
| C | 2.83760800  | -2.22905200 | -0.30349100 |
| H | 2.86881100  | 1.54068900  | -1.12036400 |
| H | 2.05469900  | 3.12533000  | -1.28500500 |
| H | 3.65057100  | 3.01323200  | -0.49102500 |
| H | 3.64617300  | -2.93710100 | -0.11562600 |
| H | 2.67976500  | -2.14050700 | -1.38959500 |
| H | 3.11636600  | -1.24449300 | 0.09345100  |
| C | 0.78447000  | 1.87412500  | 0.60712300  |
| H | -0.30388400 | -2.56903400 | 0.49055000  |
| H | 0.35797300  | -1.89877000 | -1.01928800 |
| H | 0.62352500  | 0.45609200  | -1.10930100 |
| H | 0.61313300  | -0.58052500 | 1.77669800  |
| H | 0.14870800  | 2.59925500  | 0.07197400  |
| H | 0.46496400  | 1.84023400  | 1.65291600  |

Product

|   |             |             |             |
|---|-------------|-------------|-------------|
| C | -1.87590600 | -0.78036400 | 0.71012000  |
| C | -2.40636500 | -1.07160700 | -0.68698700 |
| C | -2.26909700 | 0.05134300  | -1.40254500 |
| C | -1.66206100 | 1.10010000  | -0.48994500 |

|   |             |             |             |
|---|-------------|-------------|-------------|
| H | -2.18033900 | -1.47462000 | 1.49671600  |
| H | -2.72343500 | -2.04425200 | -1.04753200 |
| H | -2.44909000 | 0.18262000  | -2.46485800 |
| H | -1.78436200 | 2.13878200  | -0.80777200 |
| C | -0.31674600 | -0.64613800 | 0.56803600  |
| C | -0.16803500 | 0.68363000  | -0.24277200 |
| C | -2.29779900 | 0.68949400  | 0.85564100  |
| H | -3.38388600 | 0.81840600  | 0.86072100  |
| H | -1.86128200 | 1.18539700  | 1.72911700  |
| C | 0.25850800  | -1.93326600 | -0.04728100 |
| O | 1.95253200  | 1.67781400  | 0.59821300  |
| O | 1.56504800  | -2.27426200 | 0.34932200  |
| C | 2.64241900  | 2.04761400  | -0.57197900 |
| C | 2.56469200  | -1.45340300 | -0.20915000 |
| H | 2.38766100  | 1.40341200  | -1.42514500 |
| H | 2.42553400  | 3.09098600  | -0.84027600 |
| H | 3.70892600  | 1.94570800  | -0.36111600 |
| H | 3.52583500  | -1.91340900 | 0.03030900  |
| H | 2.45815900  | -1.40140300 | -1.30522700 |
| H | 2.53084000  | -0.44213800 | 0.20954100  |
| C | 0.55061900  | 1.81832200  | 0.49836400  |
| H | -0.35777000 | -2.77988900 | 0.27695600  |
| H | 0.20256400  | -1.88282200 | -1.14790600 |
| H | 0.33392200  | 0.50758900  | -1.20351400 |
| H | 0.12779500  | -0.52845600 | 1.56589200  |
| H | 0.32024600  | 2.77664500  | 0.00319200  |
| H | 0.19041800  | 1.88298000  | 1.52988600  |

Transition state

|   |             |            |             |
|---|-------------|------------|-------------|
| C | -2.32648800 | 0.50000100 | -0.73100600 |
| C | -2.66633400 | 0.70880700 | 0.60649100  |

|   |             |             |             |
|---|-------------|-------------|-------------|
| C | -2.37786500 | -0.45993800 | 1.33274400  |
| C | -1.86153400 | -1.41681800 | 0.46122000  |
| H | -2.54334400 | 1.19681200  | -1.53505200 |
| H | -2.97258100 | 1.65628700  | 1.03683100  |
| H | -2.42464700 | -0.55587800 | 2.41223600  |
| H | -1.65575900 | -2.44711400 | 0.73457200  |
| C | -0.12333900 | 0.61492400  | -0.59551200 |
| C | 0.18996000  | -0.51205800 | 0.15227000  |
| C | -2.23971500 | -0.98768000 | -0.93135500 |
| H | -3.25705100 | -1.36163400 | -1.13305200 |
| H | -1.58905600 | -1.32312100 | -1.73929400 |
| C | -0.00328300 | 2.00865700  | -0.02290300 |
| O | 2.25957500  | -1.57248200 | -0.60451000 |
| O | 1.24905100  | 2.61438400  | -0.27995200 |
| C | 2.94901700  | -1.69713300 | 0.61576500  |
| C | 2.34415200  | 1.95351500  | 0.31104300  |
| H | 2.69449300  | -0.89138500 | 1.31882200  |
| H | 2.73239900  | -2.66431200 | 1.09383900  |
| H | 4.01534400  | -1.64208000 | 0.38823500  |
| H | 3.21051200  | 2.60593600  | 0.18480600  |
| H | 2.17085600  | 1.79181700  | 1.38753700  |
| H | 2.54069400  | 0.98618400  | -0.16765100 |
| C | 0.85265000  | -1.71701200 | -0.47377900 |
| H | -0.73417100 | 2.69046900  | -0.46704300 |
| H | -0.18539200 | 1.96689600  | 1.06520900  |
| H | 0.36768200  | -0.37565300 | 1.21845200  |
| H | 0.00565700  | 0.55473600  | -1.67809500 |
| H | 0.64491400  | -2.63381600 | 0.10048600  |
| H | 0.48712100  | -1.86095200 | -1.49500800 |

System 4 (M06-2X/6-31+G(d))

Reactant

|   |             |             |             |
|---|-------------|-------------|-------------|
| C | 2.16900000  | -0.89348300 | 0.09866300  |
| C | 2.34487600  | 0.41808800  | -0.18356500 |
| C | 1.73366800  | 0.71717300  | -1.47882200 |
| C | 1.18636800  | -0.41269000 | -1.98351400 |
| H | 2.51659100  | -1.41874600 | 0.98145300  |
| H | 2.84558700  | 1.14650800  | 0.44478200  |
| H | 1.71921900  | 1.69767600  | -1.94203200 |
| H | 0.66999500  | -0.51522500 | -2.93162500 |
| C | -0.59972000 | 0.04382400  | 1.06123900  |
| C | -1.17243600 | 1.65734100  | -0.67243700 |
| C | -1.82722200 | -0.69745500 | -0.90889300 |
| N | -1.19603800 | 2.73509100  | -1.09107200 |
| N | -2.36730600 | -1.51937200 | -1.51774300 |
| C | -1.16744700 | 0.32267700  | -0.14294500 |
| C | 1.45461900  | -1.55446500 | -1.04524000 |
| H | 2.10634200  | -2.30039100 | -1.52502700 |
| H | 0.55247500  | -2.10670200 | -0.74706100 |
| C | 0.01664900  | 1.07324200  | 1.85007900  |
| C | -0.63804700 | -1.28146900 | 1.61322700  |
| N | -0.68062500 | -2.34773400 | 2.05955200  |
| N | 0.49512300  | 1.90404700  | 2.49674800  |

Product

|   |            |             |             |
|---|------------|-------------|-------------|
| C | 1.61577700 | -0.67685900 | 0.35135600  |
| C | 2.29753900 | 0.55935200  | -0.20016400 |
| C | 1.73894600 | 0.83247800  | -1.38391900 |
| C | 0.67600600 | -0.21713800 | -1.63938200 |
| H | 2.11638400 | -1.21192900 | 1.15814300  |
| H | 3.02080000 | 1.15565700  | 0.34356500  |
| H | 1.90936000 | 1.69917700  | -2.01171600 |



|   |             |             |             |
|---|-------------|-------------|-------------|
| H | 0.31333000  | -0.33011700 | -2.66091300 |
| C | 0.15712900  | -0.21452000 | 0.78729600  |
| C | -0.94624200 | 1.51419300  | -0.76818700 |
| C | -1.65855800 | -0.76202300 | -0.93519900 |
| N | -1.25047200 | 2.61847600  | -0.91485000 |
| N | -2.51950200 | -1.47328400 | -1.22959700 |
| C | -0.51646400 | 0.11566800  | -0.64016700 |
| C | 1.27984600  | -1.44351600 | -0.93735900 |
| H | 2.17815800  | -1.80031500 | -1.44391000 |
| H | 0.57644200  | -2.27092500 | -0.79646600 |
| C | 0.21056500  | 0.94645200  | 1.68519100  |
| C | -0.51825500 | -1.32144600 | 1.48031800  |
| N | -0.98323200 | -2.22735900 | 2.02520800  |
| N | 0.30924800  | 1.85259500  | 2.39418400  |

Transition state

|   |             |             |             |
|---|-------------|-------------|-------------|
| C | 0.40891600  | 1.15013100  | 1.51942400  |
| C | 1.72653600  | 0.69790400  | 1.36484400  |
| C | 1.72637500  | -0.70045400 | 1.36430400  |
| C | 0.40869100  | -1.15248100 | 1.51863400  |
| H | 0.11977400  | 2.19098400  | 1.62554300  |
| H | 2.58172900  | 1.32732800  | 1.14736500  |
| H | 2.58142600  | -1.32990200 | 1.14636700  |
| H | 0.11918000  | -2.19336600 | 1.62345300  |
| C | -0.29113900 | 0.71368100  | -0.56259200 |
| C | 0.73246800  | -1.40968200 | -1.30106000 |
| C | -1.54098200 | -1.41385200 | -0.42185600 |
| N | 1.57234300  | -1.96804400 | -1.86808900 |
| N | -2.53890700 | -1.97841400 | -0.26452200 |
| C | -0.29073800 | -0.71295500 | -0.56394400 |
| C | -0.40919000 | -0.00127600 | 2.02788100  |

|   |             |             |             |
|---|-------------|-------------|-------------|
| H | -0.33676500 | -0.00165800 | 3.12690300  |
| H | -1.47021500 | -0.00111200 | 1.77073400  |
| C | 0.73117900  | 1.41267200  | -1.29880200 |
| C | -1.54195300 | 1.41340400  | -0.41907800 |
| N | -2.54027700 | 1.97692200  | -0.26058000 |
| N | 1.57025500  | 1.97313000  | -1.86493700 |

### System 5 (M06-2X/6-31+G(d))

#### Reactant

|   |             |             |             |
|---|-------------|-------------|-------------|
| C | 0.22166100  | 0.66689700  | -1.64460000 |
| C | 0.22165600  | -0.66692800 | -1.64458800 |
| C | 2.50670100  | -1.17699800 | 0.51896600  |
| C | 1.60098300  | -0.73336700 | 1.41510400  |
| C | 1.60098800  | 0.73337900  | 1.41509200  |
| H | 2.73424400  | -2.21188000 | 0.29008600  |
| H | 0.95641600  | -1.35251300 | 2.03054800  |
| H | 0.95642400  | 1.35253900  | 2.03052500  |
| C | 2.50670900  | 1.17698800  | 0.51894700  |
| H | 2.73425900  | 2.21186500  | 0.29004900  |
| C | -0.75366200 | 1.14479200  | -0.60500100 |
| C | -0.75367000 | -1.14479800 | -0.60498100 |
| O | -1.05853400 | -2.28104000 | -0.32539400 |
| O | -1.05851700 | 2.28104100  | -0.32543400 |
| H | 0.78930300  | 1.36077000  | -2.25130500 |
| H | 0.78929200  | -1.36081700 | -2.25128200 |
| C | 3.19601200  | -0.00001200 | -0.11298600 |
| H | 3.11460600  | -0.00002100 | -1.20848300 |
| H | 4.27163100  | -0.00001400 | 0.11688200  |
| N | -1.27282100 | 0.00000400  | -0.00802000 |
| C | -2.31831000 | 0.00001700  | 1.00026100  |

|   |             |             |             |
|---|-------------|-------------|-------------|
| H | -2.16535200 | -0.88928200 | 1.61799300  |
| H | -2.16534200 | 0.88932200  | 1.61798200  |
| C | -3.70895500 | 0.00002200  | 0.37358400  |
| H | -4.47737300 | 0.00003200  | 1.15239200  |
| H | -3.84639800 | 0.89038900  | -0.24689200 |
| H | -3.84640900 | -0.89035100 | -0.24688100 |

Product

|   |             |             |             |
|---|-------------|-------------|-------------|
| C | 0.71715400  | 0.77162500  | -0.93341100 |
| C | 0.71714900  | -0.77164800 | -0.93339700 |
| C | 1.98540600  | -1.12924900 | -0.07976700 |
| C | 1.70294600  | -0.66960800 | 1.34063600  |
| C | 1.70295100  | 0.66961900  | 1.34062400  |
| H | 2.31798000  | -2.15988700 | -0.20223300 |
| H | 1.43674600  | -1.32830000 | 2.16039200  |
| H | 1.43675500  | 1.32832800  | 2.16036800  |
| C | 1.98541400  | 1.12923200  | -0.07978700 |
| H | 2.31799500  | 2.15986600  | -0.20227200 |
| C | -0.59682000 | 1.16352800  | -0.28579700 |
| C | -0.59682800 | -1.16353100 | -0.28577700 |
| O | -1.00400000 | -2.28183600 | -0.06291500 |
| O | -1.00398400 | 2.28184000  | -0.06295500 |
| H | 0.78284300  | 1.21933400  | -1.92872000 |
| H | 0.78283500  | -1.21937500 | -1.92869800 |
| C | 2.92633000  | -0.00001600 | -0.55274800 |
| H | 3.09414900  | -0.00002600 | -1.63600300 |
| H | 3.88309300  | -0.00001500 | -0.02399800 |
| N | -1.27777000 | 0.00000400  | 0.05329800  |
| C | -2.54614600 | 0.00001600  | 0.76808600  |
| H | -2.55188300 | -0.89148000 | 1.40044300  |
| H | -2.55187200 | 0.89151800  | 1.40043500  |

|   |             |             |             |
|---|-------------|-------------|-------------|
| C | -3.73360300 | 0.00001900  | -0.18743800 |
| H | -4.67075800 | 0.00002800  | 0.37695200  |
| H | -3.71303900 | 0.89077400  | -0.82195300 |
| H | -3.71305100 | -0.89074300 | -0.82194500 |

Transition state

|   |             |             |             |
|---|-------------|-------------|-------------|
| C | 0.55688000  | 0.69292600  | -1.26301900 |
| C | 0.55688200  | -0.69292800 | -1.26301900 |
| C | 2.17686000  | -1.15559300 | 0.22408900  |
| C | 1.54809000  | -0.70388500 | 1.38128300  |
| C | 1.54808800  | 0.70389000  | 1.38128200  |
| H | 2.38652300  | -2.19704800 | 0.00534000  |
| H | 1.02622800  | -1.33269900 | 2.09446000  |
| H | 1.02622400  | 1.33270300  | 2.09445800  |
| C | 2.17685600  | 1.15559800  | 0.22408700  |
| H | 2.38651700  | 2.19705300  | 0.00533700  |
| C | -0.61878300 | 1.15202000  | -0.46817200 |
| C | -0.61878000 | -1.15202500 | -0.46817100 |
| O | -1.01697700 | -2.28026900 | -0.27174700 |
| O | -1.01698300 | 2.28026300  | -0.27174800 |
| H | 1.00562400  | 1.34868400  | -1.99781600 |
| H | 1.00562800  | -1.34868500 | -1.99781500 |
| C | 2.96393700  | 0.00000300  | -0.33785300 |
| H | 3.10730100  | 0.00000300  | -1.41964200 |
| H | 3.95676200  | 0.00000500  | 0.13942500  |
| N | -1.20243400 | -0.00000300 | 0.05869200  |
| C | -2.38588200 | -0.00000400 | 0.90085700  |
| H | -2.32749200 | -0.89027400 | 1.53306800  |
| H | -2.32748700 | 0.89025900  | 1.53307900  |
| C | -3.66896900 | 0.00000500  | 0.07634400  |
| H | -4.54313800 | 0.00000400  | 0.73452600  |

|   |             |             |             |
|---|-------------|-------------|-------------|
| H | -3.71251800 | 0.89090100  | -0.55676700 |
| H | -3.71252400 | -0.89088400 | -0.55677700 |

### System 6 (M06-2X/6-31+G(d))

#### Reactant

|   |             |             |             |
|---|-------------|-------------|-------------|
| C | 0.44347200  | -0.76499100 | -1.70825400 |
| C | 0.40360200  | 0.56662500  | -1.75094700 |
| C | -1.91966100 | 1.45877500  | 0.81057700  |
| C | -0.95531100 | 0.72461900  | 1.38629300  |
| C | -1.04411100 | -0.74024700 | 1.40449500  |
| H | -1.85366800 | 2.54407100  | 0.80077800  |
| H | -0.09266200 | 1.20668700  | 1.84122800  |
| H | -0.35342400 | -1.30414100 | 2.02743000  |
| C | -1.92778100 | -1.37924600 | 0.62105300  |
| C | 1.36280000  | -1.18082900 | -0.59454400 |
| C | 1.29992100  | 1.10792600  | -0.67067700 |
| O | 1.53669700  | 2.26188800  | -0.40244000 |
| O | 1.66544900  | -2.29710500 | -0.24392100 |
| H | -0.15148700 | 1.22358000  | -2.40818900 |
| C | -3.15673300 | 0.79136500  | 0.26026700  |
| C | -2.85252600 | -0.60676800 | -0.28792200 |
| H | -1.95100600 | -2.46620100 | 0.59290700  |
| H | -0.07197900 | -1.49354400 | -2.32106200 |
| H | -3.78513300 | -1.15808900 | -0.44571700 |
| H | -2.37565000 | -0.51797600 | -1.27717200 |
| H | -3.62081300 | 1.40750300  | -0.51629000 |
| H | -3.89266500 | 0.71294400  | 1.07630900  |
| N | 1.83340500  | -0.00358200 | -0.02282900 |
| C | 2.72123300  | 0.04494400  | 1.11735900  |
| H | 3.62359100  | -0.53630800 | 0.91507800  |

|   |            |            |            |
|---|------------|------------|------------|
| H | 2.98044800 | 1.09094000 | 1.28874900 |
|---|------------|------------|------------|

|   |            |             |            |
|---|------------|-------------|------------|
| H | 2.22715900 | -0.36478400 | 2.00371900 |
|---|------------|-------------|------------|

Product

|   |             |             |             |
|---|-------------|-------------|-------------|
| C | -0.27198400 | -0.77193600 | -0.82565800 |
|---|-------------|-------------|-------------|

|   |             |            |             |
|---|-------------|------------|-------------|
| C | -0.27219100 | 0.76840300 | -0.82912600 |
|---|-------------|------------|-------------|

|   |             |            |            |
|---|-------------|------------|------------|
| C | -1.37010000 | 1.29390500 | 0.13170900 |
|---|-------------|------------|------------|

|   |             |            |            |
|---|-------------|------------|------------|
| C | -1.14140700 | 0.67127300 | 1.48805900 |
|---|-------------|------------|------------|

|   |             |             |            |
|---|-------------|-------------|------------|
| C | -1.14198300 | -0.66688100 | 1.49040500 |
|---|-------------|-------------|------------|

|   |             |            |            |
|---|-------------|------------|------------|
| H | -1.34171800 | 2.38556100 | 0.16120000 |
|---|-------------|------------|------------|

|   |             |            |            |
|---|-------------|------------|------------|
| H | -0.98674000 | 1.27948500 | 2.37454400 |
|---|-------------|------------|------------|

|   |             |             |            |
|---|-------------|-------------|------------|
| H | -0.98785700 | -1.27213400 | 2.37902200 |
|---|-------------|-------------|------------|

|   |             |             |            |
|---|-------------|-------------|------------|
| C | -1.37052900 | -1.29399800 | 0.13618400 |
|---|-------------|-------------|------------|

|   |            |             |             |
|---|------------|-------------|-------------|
| C | 1.11545900 | -1.15723500 | -0.33974000 |
|---|------------|-------------|-------------|

|   |            |            |             |
|---|------------|------------|-------------|
| C | 1.11521800 | 1.16227900 | -0.34758600 |
|---|------------|------------|-------------|

|   |            |            |             |
|---|------------|------------|-------------|
| O | 1.53432000 | 2.28471800 | -0.17772400 |
|---|------------|------------|-------------|

|   |            |             |             |
|---|------------|-------------|-------------|
| O | 1.54498300 | -2.27394300 | -0.15537100 |
|---|------------|-------------|-------------|

|   |             |            |             |
|---|-------------|------------|-------------|
| H | -0.42572500 | 1.19386900 | -1.82672500 |
|---|-------------|------------|-------------|

|   |             |            |             |
|---|-------------|------------|-------------|
| C | -2.72165800 | 0.77449600 | -0.41603300 |
|---|-------------|------------|-------------|

|   |             |             |             |
|---|-------------|-------------|-------------|
| C | -2.72175700 | -0.77621900 | -0.41390200 |
|---|-------------|-------------|-------------|

|   |             |             |            |
|---|-------------|-------------|------------|
| H | -1.34230300 | -2.38556100 | 0.16950700 |
|---|-------------|-------------|------------|

|   |             |             |             |
|---|-------------|-------------|-------------|
| H | -0.42381400 | -1.20129400 | -1.82185100 |
|---|-------------|-------------|-------------|

|   |             |             |            |
|---|-------------|-------------|------------|
| H | -3.53332300 | -1.16375900 | 0.20835700 |
|---|-------------|-------------|------------|

|   |             |             |             |
|---|-------------|-------------|-------------|
| H | -2.87405700 | -1.17001300 | -1.42549200 |
|---|-------------|-------------|-------------|

|   |             |            |             |
|---|-------------|------------|-------------|
| H | -2.87478400 | 1.16558900 | -1.42854400 |
|---|-------------|------------|-------------|

|   |             |            |            |
|---|-------------|------------|------------|
| H | -3.53264500 | 1.16379300 | 0.20588900 |
|---|-------------|------------|------------|

|   |            |            |             |
|---|------------|------------|-------------|
| N | 1.83893200 | 0.00203200 | -0.10550300 |
|---|------------|------------|-------------|

|   |            |             |            |
|---|------------|-------------|------------|
| C | 3.18388700 | -0.01582800 | 0.43408000 |
|---|------------|-------------|------------|

|   |            |             |             |
|---|------------|-------------|-------------|
| H | 3.83443900 | -0.60422000 | -0.21624300 |
|---|------------|-------------|-------------|

|   |            |            |            |
|---|------------|------------|------------|
| H | 3.53179800 | 1.01602300 | 0.48970700 |
|---|------------|------------|------------|

|   |            |             |            |
|---|------------|-------------|------------|
| H | 3.17823000 | -0.46676800 | 1.42964900 |
|---|------------|-------------|------------|

Transition state

|   |             |             |             |
|---|-------------|-------------|-------------|
| C | -0.05109100 | -0.68642400 | -1.21773300 |
| C | -0.05458400 | 0.69473200  | -1.21318600 |
| C | -1.51610000 | 1.36261400  | 0.41759900  |
| C | -0.92384000 | 0.69798100  | 1.47178700  |
| C | -0.92069400 | -0.71385600 | 1.46569400  |
| H | -1.36986200 | 2.43654000  | 0.32039500  |
| H | -0.26709100 | 1.23437100  | 2.15192000  |
| H | -0.26145600 | -1.25333900 | 2.14112700  |
| C | -1.51036400 | -1.37260200 | 0.40642400  |
| C | 1.17099600  | -1.14544600 | -0.49626300 |
| C | 1.16475200  | 1.15932200  | -0.49006000 |
| O | 1.56668600  | 2.29002100  | -0.31947900 |
| O | 1.58702800  | -2.27170400 | -0.32703500 |
| H | -0.56265700 | 1.35295100  | -1.90575600 |
| C | -2.71663200 | 0.77069300  | -0.28454100 |
| C | -2.71335300 | -0.78016500 | -0.29099400 |
| H | -1.35934700 | -2.44506300 | 0.30067800  |
| H | -0.55545600 | -1.34220700 | -1.91531600 |
| H | -3.60074400 | -1.14623800 | 0.23902900  |
| H | -2.79168700 | -1.17147100 | -1.31023700 |
| H | -2.79695000 | 1.17012000  | -1.30046500 |
| H | -3.60543200 | 1.12849900  | 0.24876300  |
| N | 1.78459900  | 0.00576200  | -0.00673000 |
| C | 2.99623300  | -0.00848900 | 0.78293800  |
| H | 3.77706900  | -0.56796200 | 0.26199200  |
| H | 3.30817300  | 1.02725500  | 0.92516000  |
| H | 2.81160300  | -0.48048900 | 1.75194400  |

## System 7 ( $\omega$ B97X-D/6-31+G(d,p))

### Reactant

|   |             |             |             |
|---|-------------|-------------|-------------|
| C | -0.74146800 | -0.64082000 | -0.05480300 |
| C | 0.74429400  | -0.63709800 | 0.05958100  |
| C | 1.37800000  | 0.65718000  | 0.32257700  |
| C | 0.69746800  | 1.81152700  | 0.18684100  |
| C | -0.70548600 | 1.80696400  | -0.20038300 |
| C | -1.38090200 | 0.64863100  | -0.32747000 |
| H | 2.43548100  | 0.66095900  | 0.57165800  |
| H | 1.19570300  | 2.76304600  | 0.34396700  |
| H | -1.20793900 | 2.75506000  | -0.36461600 |
| H | -2.43838500 | 0.64586900  | -0.57655300 |
| C | -1.48800500 | -1.74359500 | 0.14522800  |
| C | 1.49573100  | -1.73801100 | -0.13218900 |
| H | -2.56660500 | -1.71307400 | 0.02422100  |
| H | -1.05147200 | -2.68670900 | 0.45602000  |
| H | 1.06341400  | -2.68536100 | -0.43591000 |
| H | 2.57418400  | -1.70178200 | -0.01142900 |

### Product

|   |             |             |             |
|---|-------------|-------------|-------------|
| C | -0.68796100 | -0.47798100 | -0.09285700 |
| C | 0.69011400  | -0.47404100 | 0.09640200  |
| C | 1.42140100  | 0.69758800  | 0.19676000  |
| C | 0.68859800  | 1.88777800  | 0.09115800  |
| C | -0.69732500 | 1.88381000  | -0.10528300 |
| C | -1.42463700 | 0.68948900  | -0.20196200 |
| H | 2.49669100  | 0.71530800  | 0.34729200  |
| H | 1.20549300  | 2.84035700  | 0.16172700  |
| H | -1.21863700 | 2.83342200  | -0.18296800 |
| H | -2.49999400 | 0.70115300  | -0.35260400 |
| C | -0.77652900 | -1.99416100 | -0.09374500 |



|   |             |             |             |
|---|-------------|-------------|-------------|
| C | 0.78581100  | -1.98972800 | 0.10868600  |
| H | -1.11534500 | -2.44800900 | -1.02966200 |
| H | -1.33959200 | -2.43022200 | 0.73669600  |
| H | 1.35092600  | -2.42938000 | -0.71846100 |
| H | 1.12673400  | -2.43492500 | 1.04798700  |

Transition state

|   |             |             |             |
|---|-------------|-------------|-------------|
| C | 0.51657300  | -0.70672000 | 0.01699700  |
| C | 0.51663700  | 0.70661800  | -0.01713000 |
| C | -0.68638200 | 1.42366200  | 0.17312000  |
| C | -1.86003600 | 0.70259300  | 0.10968700  |
| C | -1.86012100 | -0.70241100 | -0.10965700 |
| C | -0.68655900 | -1.42362500 | -0.17317900 |
| H | -0.69380900 | 2.50493600  | 0.27572100  |
| H | -2.81248800 | 1.21772400  | 0.19003200  |
| H | -2.81264100 | -1.21743800 | -0.18987800 |
| H | -0.69412800 | -2.50490800 | -0.27569200 |
| C | 1.84754700  | -1.09920600 | 0.31449000  |
| C | 1.84777900  | 1.09911000  | -0.31451200 |
| H | 2.28299100  | -2.03196600 | -0.04757800 |
| H | 2.31682300  | -0.68148400 | 1.19480300  |
| H | 2.31751200  | 0.68139400  | -1.19458200 |
| H | 2.28311000  | 2.03162900  | 0.04827500  |

System 8 ( $\omega$ B97X-D/6-31+G(d,p))

Reactant

|   |             |             |             |
|---|-------------|-------------|-------------|
| C | 1.03470900  | -1.53078300 | 0.09942700  |
| C | 1.31407800  | -0.26030600 | -0.21443400 |
| C | 0.51001600  | 0.92543600  | 0.11319400  |
| C | -0.82766600 | 1.02575800  | 0.15679700  |

|   |             |             |             |
|---|-------------|-------------|-------------|
| C | -1.83295600 | -0.04713400 | -0.14104800 |
| H | 2.24530300  | -0.05687600 | -0.74276100 |
| H | 1.08367500  | 1.83046700  | 0.30681100  |
| H | -1.23866700 | 1.99916300  | 0.41963900  |
| H | -2.71975800 | 0.38049200  | -0.61809200 |
| H | -2.17026800 | -0.54053700 | 0.77891500  |
| H | 0.15604300  | -1.80319900 | 0.67555100  |
| H | -1.41938800 | -0.81899700 | -0.79669600 |
| H | 1.70335900  | -2.33564300 | -0.18929900 |

#### Product

|   |             |             |             |
|---|-------------|-------------|-------------|
| C | 0.88495300  | -1.59690900 | -0.21886100 |
| C | 1.30982600  | -0.19268100 | 0.09422300  |
| C | 0.54158200  | 0.90774100  | 0.11161000  |
| C | -0.90150500 | 1.00315100  | -0.14942100 |
| C | -1.83784200 | 0.10642700  | 0.18209500  |
| H | 2.36762000  | -0.05636900 | 0.31332900  |
| H | 1.03702300  | 1.85760600  | 0.30637500  |
| H | -1.22381200 | 1.92190200  | -0.63898400 |
| H | -2.88284500 | 0.27878700  | -0.05560800 |
| H | -1.59935400 | -0.80380900 | 0.72319100  |
| H | 0.67178500  | -2.16016900 | 0.69813400  |
| H | -0.01761500 | -1.61887200 | -0.83660200 |
| H | 1.68274700  | -2.13061700 | -0.74376500 |

#### Transition state

|   |             |             |             |
|---|-------------|-------------|-------------|
| C | 1.30250500  | -0.90531000 | -0.02158700 |
| C | 1.20705400  | 0.50535700  | -0.01460800 |
| C | 0.00010300  | 1.18420500  | 0.15619300  |
| C | -1.20685500 | 0.50563800  | -0.01453800 |
| C | -1.30268600 | -0.90529700 | -0.02179100 |

|   |             |             |             |
|---|-------------|-------------|-------------|
| H | 2.03927800  | 1.08904000  | -0.40446900 |
| H | 0.00019100  | 2.26821700  | 0.08922000  |
| H | -2.03914900 | 1.08964600  | -0.40379400 |
| H | -2.17149000 | -1.32827400 | -0.52731100 |
| H | -1.05619100 | -1.45353900 | 0.88497000  |
| H | 1.05550700  | -1.45384700 | 0.88481100  |
| H | -0.00016600 | -1.19021600 | -0.49850500 |
| H | 2.17129000  | -1.32857700 | -0.52693800 |

### System 9 ( $\omega$ B97X-D/6-31+G(d,p))

#### Reactant

|   |             |             |             |
|---|-------------|-------------|-------------|
| C | 1.34969500  | -0.53231600 | 0.68263200  |
| C | 1.54105800  | 0.73229900  | 0.25933400  |
| C | 1.00468500  | 0.87137300  | -1.09998800 |
| C | 0.49038300  | -0.30949100 | -1.49512000 |
| H | 1.63518900  | -0.94390100 | 1.64296300  |
| H | 2.01400200  | 1.53076200  | 0.81946500  |
| H | 1.02743600  | 1.78656000  | -1.68040300 |
| H | 0.02117100  | -0.52531000 | -2.44716600 |
| C | -2.11722300 | 0.24713100  | 1.57978500  |
| H | -1.08930700 | 0.51381400  | 1.80836300  |
| H | -2.72717800 | -0.12786000 | 2.39740400  |
| C | -2.60278300 | 0.37289000  | 0.34675000  |
| C | 0.65425800  | -1.31503300 | -0.39289500 |
| H | 1.23887200  | -2.18806600 | -0.71283800 |
| H | -0.31809300 | -1.69308600 | -0.04785500 |
| H | -1.98437700 | 0.74549000  | -0.46487800 |
| H | -3.62876200 | 0.10558700  | 0.10782500  |

#### Product

|   |            |             |            |
|---|------------|-------------|------------|
| C | 0.54573700 | -0.39342000 | 0.95908100 |
|---|------------|-------------|------------|

|   |             |             |             |
|---|-------------|-------------|-------------|
| C | 1.24306700  | 0.79031800  | 0.31181200  |
| C | 0.75406700  | 0.91508900  | -0.92795400 |
| C | -0.27573400 | -0.18361200 | -1.12362600 |
| H | 1.03973200  | -0.82767100 | 1.82983500  |
| H | 1.91998900  | 1.46738700  | 0.82096800  |
| H | 0.95177800  | 1.71446800  | -1.63350900 |
| H | -0.53261000 | -0.42613900 | -2.15610400 |
| C | -0.92961700 | 0.05329700  | 1.21198200  |
| H | -0.98057400 | 0.98266200  | 1.78486600  |
| H | -1.46703100 | -0.71663100 | 1.77484200  |
| C | -1.49795500 | 0.19866400  | -0.22894000 |
| C | 0.35243100  | -1.30377400 | -0.27037100 |
| H | 1.29621000  | -1.67376300 | -0.67990300 |
| H | -0.32868300 | -2.14252600 | -0.08624200 |
| H | -1.85933900 | 1.20753900  | -0.44363000 |
| H | -2.32552600 | -0.49694200 | -0.40126500 |

Transition state

|   |             |             |             |
|---|-------------|-------------|-------------|
| C | 0.45955300  | 1.15362400  | 0.36036200  |
| C | 1.17788000  | 0.70082700  | -0.74582200 |
| C | 1.17712400  | -0.70266400 | -0.74488600 |
| C | 0.45796300  | -1.15319600 | 0.36173500  |
| H | 0.39833300  | 2.19166800  | 0.66814600  |
| H | 1.55432300  | 1.32716900  | -1.54630400 |
| H | 1.55287200  | -1.33046500 | -1.54455200 |
| H | 0.39626700  | -2.19074200 | 0.67113700  |
| C | -1.61447900 | 0.69240600  | -0.33197500 |
| H | -1.55087300 | 1.23992700  | -1.26500700 |
| H | -2.05791100 | 1.23807500  | 0.49552700  |
| C | -1.61425600 | -0.69200800 | -0.33141000 |
| C | 0.37410400  | 0.00087200  | 1.32476500  |

|   |             |             |             |
|---|-------------|-------------|-------------|
| H | 1.29211300  | 0.00050400  | 1.93398700  |
| H | -0.48312600 | 0.00189000  | 1.99864000  |
| H | -1.55078800 | -1.24000200 | -1.26430600 |
| H | -2.05854700 | -1.23719600 | 0.49611900  |

### System 10 (B3LYP/6-31+G(d,p))

#### Reactant

|   |             |             |             |
|---|-------------|-------------|-------------|
| H | 1.17259400  | 2.09524800  | -1.04580300 |
| C | 0.75386200  | 1.31877400  | -0.41063300 |
| C | 0.00000000  | -1.85263600 | 0.77567100  |
| C | 1.60457200  | 0.92659800  | 0.77516300  |
| H | 2.40103400  | -0.03249900 | -1.04524900 |
| H | 1.10858100  | 0.64068600  | 1.69790400  |
| H | 2.53561900  | 1.46411300  | 0.93289800  |
| C | 1.51905100  | -0.00667800 | -0.41032200 |
| C | 0.76520600  | -1.31242100 | -0.41013600 |
| H | -2.40103400 | -0.03249900 | -1.04524900 |
| C | -1.51905100 | -0.00667800 | -0.41032200 |
| H | 0.00000000  | -2.92760900 | 0.93400300  |
| C | -1.60457200 | 0.92659700  | 0.77516300  |
| H | -1.17259400 | 2.09524800  | -1.04580300 |
| H | -1.10858100 | 0.64068600  | 1.69790400  |
| H | -2.53561900 | 1.46411200  | 0.93289800  |
| C | -0.75386300 | 1.31877400  | -0.41063300 |
| H | 1.22846200  | -2.06347400 | -1.04496200 |
| H | 0.00000000  | -1.27945100 | 1.69796400  |
| C | -0.76520600 | -1.31242100 | -0.41013600 |
| H | -1.22846100 | -2.06347400 | -1.04496200 |

#### Product

|   |            |            |             |
|---|------------|------------|-------------|
| H | 1.18107200 | 2.52290400 | -0.94966100 |
|---|------------|------------|-------------|

|   |             |             |             |
|---|-------------|-------------|-------------|
| C | 0.67067000  | 1.83372900  | -0.27642900 |
| C | 0.00000000  | -1.80643500 | 0.52407000  |
| C | 1.56421500  | 0.90320200  | 0.52366800  |
| H | 2.77500700  | -0.23862500 | -0.94972900 |
| H | 1.07578400  | 0.62138100  | 1.46084800  |
| H | 2.48326800  | 1.43369400  | 0.79900200  |
| C | 1.92308000  | -0.33599300 | -0.27633700 |
| C | 1.25257000  | -1.49772100 | -0.27606900 |
| H | -2.77500700 | -0.23862500 | -0.94972900 |
| C | -1.92308000 | -0.33599300 | -0.27633700 |
| H | 0.00000000  | -2.86758100 | 0.79944400  |
| C | -1.56421500 | 0.90320200  | 0.52366800  |
| H | -1.18107200 | 2.52290400  | -0.94966100 |
| H | -1.07578400 | 0.62138100  | 1.46084800  |
| H | -2.48326800 | 1.43369400  | 0.79900200  |
| C | -0.67067000 | 1.83372900  | -0.27642900 |
| H | 1.59424800  | -2.28431400 | -0.94930100 |
| H | 0.00000000  | -1.24246700 | 1.46121300  |
| C | -1.25256900 | -1.49772200 | -0.27606900 |
| H | -1.59424700 | -2.28431400 | -0.94930100 |

Transition state

|   |            |             |             |
|---|------------|-------------|-------------|
| H | 1.18022000 | 2.08077800  | -1.13609300 |
| C | 0.70874000 | 1.48496300  | -0.36165500 |
| C | 0.00000000 | -1.86055300 | 0.68716900  |
| C | 1.61128600 | 0.93027600  | 0.68716900  |
| H | 2.39211700 | -0.01828800 | -1.13609300 |
| H | 1.14240500 | 0.65956800  | 1.63318600  |
| H | 2.54429000 | 1.46894700  | 0.85584900  |
| C | 1.64038500 | -0.12869400 | -0.36165500 |
| C | 0.93164500 | -1.35626800 | -0.36165500 |

|   |             |             |             |
|---|-------------|-------------|-------------|
| H | -2.39211700 | -0.01828800 | -1.13609300 |
| C | -1.64038500 | -0.12869400 | -0.36165500 |
| H | 0.00000000  | -2.93789300 | 0.85584900  |
| C | -1.61128600 | 0.93027600  | 0.68716900  |
| H | -1.18022000 | 2.08077800  | -1.13609300 |
| H | -1.14240500 | 0.65956800  | 1.63318600  |
| H | -2.54429000 | 1.46894700  | 0.85584900  |
| C | -0.70874000 | 1.48496300  | -0.36165500 |
| H | 1.21189700  | -2.06249000 | -1.13609300 |
| H | 0.00000000  | -1.31913600 | 1.63318600  |
| C | -0.93164500 | -1.35626800 | -0.36165500 |
| H | -1.21189700 | -2.06249000 | -1.13609300 |

#### System 11 (B3LYP/6-31+G(d,p))

##### Reactant

|   |             |             |             |
|---|-------------|-------------|-------------|
| C | -1.03130500 | 1.73174100  | -0.86019700 |
| C | 0.21336100  | 2.52637800  | -0.37894400 |
| H | 1.04247300  | 2.63598700  | -1.08519900 |
| H | -0.05321600 | 3.51949300  | -0.00295600 |
| H | -0.78335600 | 1.03483700  | -1.66546300 |
| H | -1.91045000 | 2.30729500  | -1.16857700 |
| C | -1.08962900 | 1.05757100  | 0.54523600  |
| C | 0.39741800  | 1.49870700  | 0.77854200  |
| H | 0.57035600  | 1.94607100  | 1.76457800  |
| C | 1.46073000  | 0.41467100  | 0.54511900  |
| H | -1.72785300 | 1.68889700  | 1.17543800  |
| C | -1.49702800 | -0.40549900 | 0.77786300  |
| C | -2.29411100 | -1.07843200 | -0.38036200 |
| C | -0.98316100 | -1.75836700 | -0.86111300 |
| H | -2.80334100 | -0.41499100 | -1.08660000 |

|   |             |             |             |
|---|-------------|-------------|-------------|
| H | -1.97163700 | -0.47976800 | 1.76352700  |
| H | -3.02090100 | -1.80619800 | -0.00507100 |
| H | -0.50318600 | -1.19407400 | -1.66534000 |
| H | -1.04144700 | -2.80721800 | -1.17056600 |
| C | -0.37111700 | -1.47264400 | 0.54490900  |
| C | 1.09950400  | -1.09391600 | 0.77815000  |
| H | -0.59897200 | -2.34134700 | 1.17458500  |
| H | 1.40079500  | -1.46774500 | 1.76394000  |
| C | 2.08114000  | -1.44775900 | -0.37982800 |
| H | 1.76176600  | -2.22083800 | -1.08594200 |
| C | 2.01419400  | 0.02741500  | -0.86088700 |
| H | 2.95160900  | 0.50145900  | -1.17038000 |
| H | 2.32702800  | 0.65169900  | 1.17472400  |
| H | 1.28555500  | 0.16076600  | -1.66519500 |
| H | 3.07482300  | -1.71274500 | -0.00420800 |

Product

|   |             |             |             |
|---|-------------|-------------|-------------|
| C | -1.09852100 | 1.75642200  | -0.70634200 |
| C | 0.16293200  | 2.59884400  | -0.36500600 |
| H | 0.68777200  | 2.81442200  | -1.30489800 |
| H | -0.17272000 | 3.57016400  | 0.01723900  |
| H | -0.83651300 | 0.94573600  | -1.39105600 |
| H | -1.78389900 | 2.41295000  | -1.26428700 |
| C | -1.80330600 | 1.20305800  | 0.50272900  |
| C | 1.12701700  | 2.01198700  | 0.65173400  |
| H | 1.16308800  | 2.52752300  | 1.61070800  |
| C | 1.94286400  | 0.95918000  | 0.50281500  |
| H | -1.90003200 | 1.89111200  | 1.34381600  |
| C | -2.30753200 | -0.02974300 | 0.65166400  |
| C | -2.33263200 | -1.15871700 | -0.36442800 |
| C | -0.97139800 | -1.82757000 | -0.70604100 |



|   |             |             |             |
|---|-------------|-------------|-------------|
| H | -2.78280500 | -0.81317400 | -1.30426400 |
| H | -2.77255400 | -0.25582000 | 1.61048900  |
| H | -3.00452200 | -1.93599000 | 0.01853000  |
| H | -0.40085400 | -1.19297600 | -1.38893700 |
| H | -1.19555400 | -2.74864300 | -1.26592000 |
| C | -0.13980200 | -2.16217500 | 0.50283400  |
| C | 1.18011400  | -1.98316400 | 0.65114900  |
| H | -0.68723500 | -2.58986400 | 1.34400400  |
| H | 1.60887800  | -2.27349800 | 1.60957900  |
| C | 2.17010900  | -1.44092900 | -0.36549600 |
| H | 2.09491600  | -2.00326300 | -1.30542700 |
| C | 2.07003700  | 0.07266000  | -0.70657400 |
| H | 2.98082900  | 0.33879300  | -1.26487600 |
| H | 2.58690800  | 0.69875500  | 1.34398700  |
| H | 1.23644100  | 0.25066900  | -1.39075200 |
| H | 3.17924500  | -1.63513900 | 0.01680700  |

Transition state

|   |             |             |             |
|---|-------------|-------------|-------------|
| C | -1.12472100 | 1.80375000  | -0.76045700 |
| C | 0.18437500  | 2.52494300  | -0.42135900 |
| H | 0.89556100  | 2.61957100  | -1.24962100 |
| H | 0.00000000  | 3.53600300  | -0.04054200 |
| H | -0.96514000 | 1.07159800  | -1.55901400 |
| H | -1.96677700 | 2.43999000  | -1.06777600 |
| C | -1.31506500 | 1.09863300  | 0.58001400  |
| C | 0.66815400  | 1.62944400  | 0.73543900  |
| H | 0.67951800  | 2.09987100  | 1.71705000  |
| C | 1.60897700  | 0.58956300  | 0.58001400  |
| H | -1.57429600 | 1.76825100  | 1.39808100  |
| C | -1.74521700 | -0.23608400 | 0.73543900  |
| C | -2.27885200 | -1.10279800 | -0.42135900 |

|   |             |             |             |
|---|-------------|-------------|-------------|
| C | -0.99973300 | -1.87591200 | -0.76045700 |
| H | -2.71639500 | -0.53420700 | -1.24962100 |
| H | -2.15830000 | -0.46145600 | 1.71705000  |
| H | -3.06226900 | -1.76800200 | -0.04054200 |
| H | -0.44546100 | -1.37163500 | -1.55901400 |
| H | -1.12970500 | -2.92327400 | -1.06777600 |
| C | -0.29391100 | -1.68819600 | 0.58001400  |
| C | 1.07706300  | -1.39336000 | 0.73543900  |
| H | -0.74420200 | -2.24750600 | 1.39808100  |
| H | 1.47878200  | -1.63841500 | 1.71705000  |
| C | 2.09447700  | -1.42214500 | -0.42135900 |
| H | 1.82083500  | -2.08536400 | -1.24962100 |
| C | 2.12445400  | 0.07216200  | -0.76045700 |
| H | 3.09648200  | 0.48328400  | -1.06777600 |
| H | 2.31849800  | 0.47925500  | 1.39808100  |
| H | 1.41060100  | 0.30003700  | -1.55901400 |
| H | 3.06226900  | -1.76800200 | -0.04054200 |

System 12 ( $\omega$ B97X-D/6-31+G(d,p))

Reactant

|   |             |             |             |
|---|-------------|-------------|-------------|
| C | 1.95980500  | 1.47461800  | 0.59611900  |
| H | 1.92210500  | 1.34540600  | 1.67569200  |
| C | 1.49852100  | 0.54002400  | -0.23204000 |
| H | 1.53304800  | 0.69297100  | -1.30922200 |
| C | 0.90189000  | -0.76133800 | 0.22063200  |
| H | 0.86713400  | -0.81123600 | 1.31857800  |
| O | -0.39724700 | -0.97101000 | -0.32322200 |
| C | -1.36972300 | -0.15563900 | 0.16264600  |
| C | -2.54589600 | -0.01091600 | -0.44238200 |
| H | -2.76581800 | -0.51499300 | -1.37682300 |
| H | 1.49410600  | -1.60622000 | -0.14046200 |

|   |             |            |            |
|---|-------------|------------|------------|
| H | 2.39536300  | 2.39730300 | 0.22621800 |
| H | -1.12879700 | 0.35358700 | 1.09598200 |
| H | -3.30627600 | 0.61408100 | 0.00852900 |

Product

|   |             |             |             |
|---|-------------|-------------|-------------|
| C | 0.33768900  | 1.21241700  | 0.29190800  |
| H | 0.34114600  | 1.12280900  | 1.38530700  |
| C | 1.34787700  | 0.26887500  | -0.29928000 |
| H | 1.44725800  | 0.29629400  | -1.38472000 |
| C | 2.08986300  | -0.58919700 | 0.39876800  |
| H | 2.01661500  | -0.65319000 | 1.48218100  |
| O | -2.27605800 | -1.10599100 | -0.58305200 |
| C | -1.60657500 | -0.40176000 | 0.13575800  |
| C | -1.07827400 | 0.95856900  | -0.24897300 |
| H | -1.12481100 | 1.05706500  | -1.33780800 |
| H | 2.79597600  | -1.25456800 | -0.08753100 |
| H | 0.61704200  | 2.24658500  | 0.05922600  |
| H | -1.35535100 | -0.73376800 | 1.16701700  |
| H | -1.76989300 | 1.69892400  | 0.17676100  |

Transition state

|   |             |             |             |
|---|-------------|-------------|-------------|
| C | 0.56643700  | 1.43926200  | 0.32726800  |
| H | 0.36050200  | 1.36694300  | 1.39065800  |
| C | 1.33711400  | 0.47778300  | -0.29988200 |
| H | 1.64296400  | 0.64159300  | -1.32960900 |
| C | 1.31231400  | -0.83747100 | 0.18189400  |
| H | 1.21084600  | -1.01090300 | 1.24925500  |
| O | -0.42855600 | -1.37425600 | -0.25163200 |
| C | -1.25243700 | -0.52808600 | 0.25763500  |
| C | -1.47064000 | 0.71828500  | -0.29375200 |
| H | -1.24215900 | 0.89159700  | -1.33885800 |

|   |             |             |             |
|---|-------------|-------------|-------------|
| H | 1.83659700  | -1.61996900 | -0.35452000 |
| H | 0.47221500  | 2.43658400  | -0.09219900 |
| H | -1.62686900 | -0.72335300 | 1.27412900  |
| H | -2.18238100 | 1.39291900  | 0.17521800  |

### System 13 ( $\omega$ B97X-D/6-31+G(d,p))

#### Reactant

|   |             |             |             |
|---|-------------|-------------|-------------|
| C | 0.07198300  | 2.42987900  | 0.62484800  |
| H | 0.04089700  | 2.31195300  | 1.70596500  |
| C | 0.41846700  | 1.42263500  | -0.17292600 |
| H | 0.43372700  | 1.55324800  | -1.25448400 |
| C | 0.80566400  | 0.05229800  | 0.31388100  |
| H | 0.69100800  | 0.00842600  | 1.40796400  |
| O | -0.03829200 | -0.94177300 | -0.27764900 |
| C | -1.33461200 | -0.93387300 | 0.12624600  |
| C | -2.29355700 | -1.56948900 | -0.54269300 |
| H | -2.08340000 | -2.09549900 | -1.46726700 |
| H | -0.18895600 | 3.40599600  | 0.22869600  |
| H | -3.30430900 | -1.57366400 | -0.15473300 |
| H | -1.53333500 | -0.39029100 | 1.04992700  |
| C | 2.23120700  | -0.31447500 | -0.06584000 |
| H | 2.35553200  | -0.27952400 | -1.15214700 |
| H | 2.93303000  | 0.38911500  | 0.38943300  |
| H | 2.46431700  | -1.32557600 | 0.27736500  |

#### Product

|   |             |            |             |
|---|-------------|------------|-------------|
| C | -0.93391100 | 1.13536500 | 0.21787100  |
| H | -0.92205800 | 1.11680800 | 1.31497100  |
| C | 0.43661700  | 0.81581000 | -0.31133500 |
| H | 0.55140800  | 0.84978800 | -1.39633000 |

|   |             |             |             |
|---|-------------|-------------|-------------|
| C | 1.48511500  | 0.47466500  | 0.43905600  |
| H | 1.36159200  | 0.43509600  | 1.52272200  |
| O | -1.92314100 | -2.24225800 | -0.51838500 |
| C | -1.75353900 | -1.25548200 | 0.15904000  |
| C | -1.99874600 | 0.15846500  | -0.30605400 |
| H | -2.05559600 | 0.16275100  | -1.39879900 |
| H | -1.22228300 | 2.15159500  | -0.07526000 |
| H | -2.98667600 | 0.45215400  | 0.07592000  |
| H | -1.40945600 | -1.35374800 | 1.21227200  |
| C | 2.84807000  | 0.13474400  | -0.08584400 |
| H | 2.88341300  | 0.19866800  | -1.17707200 |
| H | 3.60557100  | 0.81319200  | 0.32227300  |
| H | 3.13659300  | -0.88101600 | 0.20631800  |

Transition state

|   |             |             |             |
|---|-------------|-------------|-------------|
| C | -0.90124200 | 1.54220800  | 0.28961400  |
| H | -1.13412000 | 1.37547900  | 1.33636200  |
| C | 0.34771000  | 1.23340100  | -0.20727100 |
| H | 0.59581700  | 1.52683600  | -1.22516100 |
| C | 1.10268600  | 0.20479100  | 0.37909200  |
| H | 0.96448900  | 0.03666500  | 1.44527500  |
| O | 0.05496400  | -1.30935600 | -0.11955100 |
| C | -1.16191100 | -1.13265500 | 0.25255400  |
| C | -2.03596800 | -0.30575900 | -0.42097700 |
| H | -1.84427100 | -0.04440600 | -1.45514300 |
| H | -1.53927000 | 2.25994100  | -0.21696700 |
| H | -3.05509700 | -0.19383200 | -0.06026200 |
| H | -1.45201300 | -1.49368400 | 1.25165100  |
| C | 2.43282900  | -0.21448200 | -0.16412300 |
| H | 2.45285700  | -0.13107700 | -1.25346200 |
| H | 3.22188300  | 0.42318400  | 0.25009900  |

H 2.64538800 -1.24928400 0.11067700

### System 14 ( $\omega$ B97X-D/6-31+G(d,p))

#### Reactant

C 1.49673900 0.82089600 1.62108500  
H 0.98035000 0.64584700 2.56142100  
C 1.23739600 0.08902400 0.53563100  
C 0.22378000 -1.02884200 0.58366400  
H -0.23470900 -1.09742000 1.57948400  
O -0.78713500 -0.88458100 -0.41063100  
C -1.63412000 0.16110500 -0.22544600  
C -2.41485800 0.62487700 -1.19834600  
H -2.38378300 0.20249900 -2.19662500  
H 0.69880400 -1.98777500 0.35647800  
H 2.23817900 1.61469900 1.60711900  
H -3.10681900 1.43131500 -0.99110800  
C 1.90767600 0.30617000 -0.79227400  
H 1.16282500 0.53823800 -1.56055800  
H 2.63007100 1.12430200 -0.74634300  
H 2.42870800 -0.60249300 -1.11598400  
H -1.64450200 0.58165200 0.78021800

#### Product

C 0.10662100 1.03845500 0.78716300  
H -0.34932400 0.82512900 1.76058700  
C 1.08309600 -0.06116900 0.43285600  
C 1.26069900 -1.11585500 1.23249700  
H 0.71102900 -1.22268600 2.16388000  
O -2.05735800 -0.50137000 -1.56269200  
C -1.79339900 -0.03073400 -0.48041700  
C -0.99789100 1.23169600 -0.26801600

|   |             |             |             |
|---|-------------|-------------|-------------|
| H | -0.59828200 | 1.56180600  | -1.23066300 |
| H | 1.96273200  | -1.90597400 | 0.98186400  |
| H | 0.64686900  | 1.98763000  | 0.89197200  |
| H | -1.69562400 | 2.00347700  | 0.08418700  |
| C | 1.82542000  | 0.09503200  | -0.86841100 |
| H | 1.14309300  | 0.01142000  | -1.72222000 |
| H | 2.30227600  | 1.08046800  | -0.93033700 |
| H | 2.59738400  | -0.66954100 | -0.98086900 |
| H | -2.14440100 | -0.53202600 | 0.44760700  |

Transition state

|   |             |             |             |
|---|-------------|-------------|-------------|
| C | 0.40329900  | 1.09668000  | 0.94188000  |
| H | -0.19023500 | 0.98222300  | 1.84286400  |
| C | 1.06504600  | 0.00747900  | 0.39959100  |
| C | 0.49185300  | -1.25327200 | 0.62699600  |
| H | -0.04223100 | -1.43750900 | 1.55367400  |
| O | -1.03474600 | -1.17430200 | -0.47192500 |
| C | -1.72931800 | -0.14420000 | -0.13835400 |
| C | -1.34774000 | 1.14111600  | -0.46580500 |
| H | -0.68401400 | 1.30780100  | -1.30781800 |
| H | 0.92708600  | -2.13628400 | 0.17092700  |
| H | 0.73630800  | 2.11017700  | 0.73452500  |
| H | -1.96700300 | 1.97837800  | -0.15488000 |
| C | 2.00127100  | 0.18455100  | -0.76945300 |
| H | 1.46337200  | 0.02249300  | -1.71301800 |
| H | 2.43162500  | 1.18929000  | -0.79057300 |
| H | 2.82531200  | -0.53389200 | -0.73457700 |
| H | -2.52872300 | -0.28238500 | 0.60515900  |

## System 15 ( $\omega$ B97X-D/6-31+G(d,p))

### Reactant

|   |             |             |             |
|---|-------------|-------------|-------------|
| C | -1.20372000 | -1.95540500 | -0.53044600 |
| C | -0.24615300 | -1.36065500 | 0.17689100  |
| O | 1.01672900  | -1.17864100 | -0.30463300 |
| C | 1.68640700  | -0.03293300 | 0.21752500  |
| C | 1.06326700  | 1.24596200  | -0.25746200 |
| C | 0.50428800  | 2.14693600  | 0.55074400  |
| H | -0.97872700 | -2.25739900 | -1.55081500 |
| H | -0.40887200 | -1.01622600 | 1.20068900  |
| H | 2.71628100  | -0.12884100 | -0.13548800 |
| H | 1.69496900  | -0.07211200 | 1.31737200  |
| H | 1.05503700  | 1.40106400  | -1.33608100 |
| H | 0.50954300  | 1.95806200  | 1.62578300  |
| C | -2.57241100 | -2.24356600 | 0.01215000  |
| H | -2.78181800 | -3.31930100 | 0.02018000  |
| H | -2.68127600 | -1.87472400 | 1.03711200  |
| H | -3.34774100 | -1.76918500 | -0.59985700 |
| C | -0.15027000 | 3.41931600  | 0.10493000  |
| H | -0.11207900 | 3.52878500  | -0.98234000 |
| H | -1.20073100 | 3.44264700  | 0.41561100  |
| H | 0.33671200  | 4.29088900  | 0.55615000  |

### Product

|   |             |             |             |
|---|-------------|-------------|-------------|
| C | -0.87071100 | -0.44382300 | -0.36563200 |
| C | -0.05880600 | -1.68527400 | -0.06373700 |
| O | 0.23156200  | -2.53296000 | -0.87525200 |
| C | 2.29588600  | 0.86545800  | 0.59543200  |
| C | 1.22253700  | 0.91319100  | -0.19152500 |
| C | -0.20450600 | 0.79407200  | 0.27983600  |
| H | -0.88684200 | -0.32595100 | -1.45605500 |



|   |             |             |             |
|---|-------------|-------------|-------------|
| H | 0.23988500  | -1.80448000 | 1.00196500  |
| H | 3.29960600  | 0.95573100  | 0.19259100  |
| H | 2.20528900  | 0.73248500  | 1.67131600  |
| H | 1.35487600  | 1.04359500  | -1.26690900 |
| H | -0.19438800 | 0.64398500  | 1.36954100  |
| C | -2.30171200 | -0.69151300 | 0.13834900  |
| H | -2.71220300 | -1.60544300 | -0.29986000 |
| H | -2.32337900 | -0.79368900 | 1.22964900  |
| H | -2.96151100 | 0.13467600  | -0.13650900 |
| C | -0.97227600 | 2.08764300  | -0.02277100 |
| H | -1.05926400 | 2.24414100  | -1.10417700 |
| H | -1.98012900 | 2.07098800  | 0.40057400  |
| H | -0.44485900 | 2.94698600  | 0.40023100  |

Transition state

|   |             |             |             |
|---|-------------|-------------|-------------|
| C | -0.83536500 | -0.87660900 | -0.39346400 |
| C | 0.28234200  | -1.51046700 | 0.12757200  |
| O | 1.46058000  | -1.37307600 | -0.34653100 |
| C | 2.13296200  | 0.34247400  | 0.28790200  |
| C | 1.13696500  | 1.19271200  | -0.17768000 |
| C | -0.13143900 | 1.17946100  | 0.38898700  |
| H | -0.76240900 | -0.49465200 | -1.40812000 |
| H | 0.17138100  | -2.00631400 | 1.10839500  |
| H | 3.09231400  | 0.29758100  | -0.21370000 |
| H | 2.14067300  | 0.03096700  | 1.32752700  |
| H | 1.25266700  | 1.62807600  | -1.16831000 |
| H | -0.22246700 | 0.86083100  | 1.42540700  |
| C | -2.21065300 | -1.16914900 | 0.13845300  |
| H | -2.72618300 | -1.89904500 | -0.49631800 |
| H | -2.16519400 | -1.57925200 | 1.15266800  |
| H | -2.84304100 | -0.27612500 | 0.16540100  |

|   |             |            |             |
|---|-------------|------------|-------------|
| C | -1.22571500 | 2.08075200 | -0.10995300 |
| H | -1.14613500 | 2.24413400 | -1.18843000 |
| H | -2.22064400 | 1.68777500 | 0.11077400  |
| H | -1.15019000 | 3.05558400 | 0.38605500  |

### System 16 ( $\omega$ B97X-D/6-31+G(d,p))

#### Reactant

|   |             |             |             |
|---|-------------|-------------|-------------|
| C | 1.78567000  | -1.25492500 | 0.36760400  |
| C | 0.68811500  | -0.93275800 | -0.31220400 |
| O | -0.54516200 | -1.42134500 | 0.00264600  |
| C | -1.61940800 | -0.51902600 | -0.26716300 |
| C | -1.64404800 | 0.61882200  | 0.71363000  |
| C | -1.25180000 | 1.87608300  | 0.48684000  |
| H | 1.68110000  | -1.88834400 | 1.24545400  |
| H | 0.72149900  | -0.28650000 | -1.19276700 |
| H | -2.52404000 | -1.12438700 | -0.17783100 |
| H | -1.55092600 | -0.16707200 | -1.30481600 |
| H | -1.96769600 | 0.35383900  | 1.71803200  |
| C | 3.16122500  | -0.80418700 | -0.02662000 |
| H | 3.81007500  | -1.65600800 | -0.26002900 |
| H | 3.13145800  | -0.15625700 | -0.90860900 |
| H | 3.64165000  | -0.24644600 | 0.78500100  |
| C | -0.72213800 | 2.46482800  | -0.78794400 |
| H | -0.75356500 | 1.77062800  | -1.63008100 |
| H | -1.29123400 | 3.35845100  | -1.06538400 |
| H | 0.31895400  | 2.77852800  | -0.64962600 |
| H | -1.29950300 | 2.57028500  | 1.32517500  |

#### Product

|   |            |             |            |
|---|------------|-------------|------------|
| C | 1.02593600 | -0.25737500 | 0.46569300 |
|---|------------|-------------|------------|

|   |             |             |             |
|---|-------------|-------------|-------------|
| C | 0.69615800  | -1.37078900 | -0.50409700 |
| O | 0.69271500  | -2.54550700 | -0.21451100 |
| C | -2.50094900 | 0.39222900  | 0.02944600  |
| C | -1.38950500 | 0.29435300  | 0.75754800  |
| C | -0.03503400 | 0.87780200  | 0.42973700  |
| H | 1.00815600  | -0.70780300 | 1.46465500  |
| H | 0.48135100  | -1.05783900 | -1.54818300 |
| H | -3.42164200 | -0.08169500 | 0.35405000  |
| H | -2.53862300 | 0.94069700  | -0.90733800 |
| H | -1.42524100 | -0.28006900 | 1.68378600  |
| C | 2.45154000  | 0.23711700  | 0.17747800  |
| H | 3.18002600  | -0.54723900 | 0.39904100  |
| H | 2.57967100  | 0.52830800  | -0.87020900 |
| H | 2.68433300  | 1.10762800  | 0.79914800  |
| C | -0.01726200 | 1.71962600  | -0.84784100 |
| H | -0.25709500 | 1.13029800  | -1.73876600 |
| H | -0.75215800 | 2.52673800  | -0.77834200 |
| H | 0.96151000  | 2.18056900  | -1.00153900 |
| H | 0.23355900  | 1.54451900  | 1.26285800  |

Transition state

|   |             |             |             |
|---|-------------|-------------|-------------|
| C | 1.13149400  | -0.64285900 | 0.45243600  |
| C | 0.33498400  | -1.21469400 | -0.52383500 |
| O | -0.83653000 | -1.68369000 | -0.29205300 |
| C | -2.07376800 | -0.23065700 | -0.08558100 |
| C | -1.39504400 | 0.55868000  | 0.84273000  |
| C | -0.22063600 | 1.22125400  | 0.51090000  |
| H | 0.87916800  | -0.85937600 | 1.48620900  |
| H | 0.64543200  | -1.09180800 | -1.57530200 |
| H | -2.91596200 | -0.83057100 | 0.23836400  |
| H | -2.08418000 | 0.02747700  | -1.13851200 |

|   |             |             |             |
|---|-------------|-------------|-------------|
| H | -1.56459000 | 0.34417600  | 1.89468800  |
| C | 2.53066100  | -0.17096900 | 0.17358600  |
| H | 3.26841700  | -0.88829900 | 0.55044300  |
| H | 2.70315800  | -0.04730100 | -0.90059300 |
| H | 2.73827200  | 0.78850800  | 0.66084800  |
| C | 0.06784600  | 1.85466000  | -0.82415000 |
| H | -0.40421800 | 1.32960500  | -1.65618200 |
| H | -0.30928000 | 2.88424000  | -0.81951100 |
| H | 1.14295100  | 1.90232400  | -1.01735900 |
| H | 0.33984600  | 1.65805300  | 1.33681200  |

### System 17 ( $\omega$ B97X-D/6-31+G(d,p))

#### Reactant

|   |             |             |             |
|---|-------------|-------------|-------------|
| C | -1.93618800 | -0.63021400 | -0.76646700 |
| C | -0.91589200 | 0.19719000  | -0.98830700 |
| O | -0.61215100 | 1.24114800  | -0.16293300 |
| C | 0.78417400  | 1.38709300  | 0.10661300  |
| C | 1.25295700  | 0.36426100  | 1.10259000  |
| C | 1.92977900  | -0.75681000 | 0.83618200  |
| H | -0.28304000 | 0.10990200  | -1.87324400 |
| H | 0.89211400  | 2.39603200  | 0.51076700  |
| H | 1.34815000  | 1.33767000  | -0.83407400 |
| H | 0.94866700  | 0.54964100  | 2.13071200  |
| C | -2.82642600 | -0.59882700 | 0.43864000  |
| H | -2.45332000 | 0.11089400  | 1.17994400  |
| H | -3.84803000 | -0.30590700 | 0.17029700  |
| H | -2.88537100 | -1.59000600 | 0.90129700  |
| C | 2.41269800  | -1.24980200 | -0.49597500 |
| H | 2.21887700  | -0.54877100 | -1.31012400 |
| H | 3.48958300  | -1.44785300 | -0.46643500 |

|   |             |             |             |
|---|-------------|-------------|-------------|
| H | 1.91848900  | -2.19561800 | -0.74460300 |
| H | 2.15527800  | -1.41297100 | 1.67626600  |
| H | -2.13401000 | -1.37554800 | -1.53252300 |

Product

|   |             |             |             |
|---|-------------|-------------|-------------|
| C | -0.83023000 | -0.81518800 | -0.27246100 |
| C | -1.03559100 | 0.35008600  | -1.21878900 |
| O | -2.04880700 | 1.00787100  | -1.28745900 |
| C | 1.80144600  | 1.43862300  | 0.81211200  |
| C | 0.79760300  | 0.59333100  | 1.04369300  |
| C | 0.58020900  | -0.75046600 | 0.38792900  |
| H | -0.18300700 | 0.58020300  | -1.88995700 |
| H | 1.85807600  | 2.38976500  | 1.33161800  |
| H | 2.59774100  | 1.22043800  | 0.10628200  |
| H | 0.03788700  | 0.88440200  | 1.76821000  |
| C | -1.97481900 | -0.94127700 | 0.72968400  |
| H | -2.03889600 | -0.06336900 | 1.37852300  |
| H | -2.93327400 | -1.02690600 | 0.21337500  |
| H | -1.83446700 | -1.82708000 | 1.35624400  |
| C | 1.69563600  | -1.15833000 | -0.57657200 |
| H | 1.78966900  | -0.46765600 | -1.42100000 |
| H | 2.66146100  | -1.18634100 | -0.06374500 |
| H | 1.50192500  | -2.15629800 | -0.98113600 |
| H | 0.55744200  | -1.49735000 | 1.19422000  |
| H | -0.83044300 | -1.70830000 | -0.91773900 |

Transition state

|   |             |             |             |
|---|-------------|-------------|-------------|
| C | -1.15355100 | -0.78180100 | -0.48231400 |
| C | -0.72131400 | 0.33728600  | -1.17204800 |
| O | -0.64777500 | 1.50541500  | -0.64454100 |
| C | 0.94121000  | 1.57075100  | 0.44470300  |

|   |             |             |             |
|---|-------------|-------------|-------------|
| C | 0.82978100  | 0.38605500  | 1.17509600  |
| C | 0.93121500  | -0.85601200 | 0.56233000  |
| H | -0.23550100 | 0.18068800  | -2.14706400 |
| H | 0.72755200  | 2.51692900  | 0.92801200  |
| H | 1.60723100  | 1.64208500  | -0.40773800 |
| H | 0.30226400  | 0.43264600  | 2.12361100  |
| C | -2.04847600 | -0.71041200 | 0.72263400  |
| H | -1.98566500 | 0.27392900  | 1.18998300  |
| H | -3.08991500 | -0.87382600 | 0.42129500  |
| H | -1.80119200 | -1.47514800 | 1.46630900  |
| C | 1.85877700  | -1.18664100 | -0.57706600 |
| H | 2.06157000  | -0.33243200 | -1.22510500 |
| H | 2.81635800  | -1.52941600 | -0.16668900 |
| H | 1.45742200  | -1.99364500 | -1.19531700 |
| H | 0.64549400  | -1.71865400 | 1.16277500  |
| H | -1.14927300 | -1.72183100 | -1.03375000 |

**Optimized Cartesian coordinates for minima and transition state structures associated with reactions listed in Table 3 of the manuscript.**

System 1 ( $\omega$ B97X-D/6-31G)

Reactant

|   |             |             |             |
|---|-------------|-------------|-------------|
| C | -2.33896500 | -0.67088200 | 0.95298700  |
| C | -2.34420900 | 0.66744100  | 0.95087500  |
| C | 0.66175600  | 1.50204300  | 1.73544900  |
| C | 1.21763700  | 0.73924900  | 0.79014100  |
| C | 1.23079500  | -0.73638500 | 0.79770300  |
| C | 0.72388500  | -1.49858700 | 1.77036700  |
| C | -1.85520300 | -1.14919600 | -0.36975600 |

|    |             |             |             |
|----|-------------|-------------|-------------|
| C  | -1.86177500 | 1.14604400  | -0.37250000 |
| H  | 0.67879700  | 2.58245800  | 1.67179700  |
| H  | 0.74638700  | -2.57922900 | 1.71074700  |
| O  | -1.74217200 | 2.27077200  | -0.80952400 |
| O  | -1.73213000 | -2.27387900 | -0.80552000 |
| H  | 0.29747500  | -1.06114600 | 2.66554800  |
| H  | 0.19064700  | 1.06498300  | 2.60821600  |
| H  | -2.63804800 | -1.35130300 | 1.73472700  |
| H  | -2.64925400 | 1.34784400  | 1.73030500  |
| Cl | 1.97000500  | -1.57927100 | -0.62363200 |
| Cl | 1.99296100  | 1.58132500  | -0.61176500 |
| O  | -1.55319600 | -0.00138800 | -1.14126700 |

Product

|    |             |             |             |
|----|-------------|-------------|-------------|
| C  | -1.36591000 | -0.77223600 | 1.09100400  |
| C  | -1.36637000 | 0.77119700  | 1.09099200  |
| C  | 0.01048700  | 1.41264700  | 1.38394400  |
| C  | 1.10625500  | 0.66621200  | 0.67138400  |
| C  | 1.10666000  | -0.66576800 | 0.67138100  |
| C  | 0.01133500  | -1.41287900 | 1.38391800  |
| C  | -1.84426800 | -1.15662600 | -0.30020000 |
| C  | -1.84488600 | 1.15528800  | -0.30023900 |
| H  | -0.00837500 | 2.46200400  | 1.08146800  |
| H  | -0.00691300 | -2.46223100 | 1.08139300  |
| O  | -1.97740500 | 2.26103200  | -0.77951400 |
| O  | -1.97622300 | -2.26246000 | -0.77942500 |
| H  | 0.19214500  | -1.38741700 | 2.46530400  |
| H  | 0.19130800  | 1.38724200  | 2.46532900  |
| H  | -2.09235700 | -1.17122600 | 1.80549900  |
| H  | -2.09307300 | 1.16976900  | 1.80546000  |
| Cl | 2.38251800  | -1.65098300 | -0.11706600 |

|    |             |             |             |
|----|-------------|-------------|-------------|
| Cl | 2.38148000  | 1.65221000  | -0.11709300 |
| O  | -2.13862300 | -0.00076100 | -1.03758300 |

Transition state

|    |             |             |             |
|----|-------------|-------------|-------------|
| C  | -1.76675100 | -0.69444900 | 0.94732900  |
| C  | -1.76667600 | 0.69463700  | 0.94731100  |
| C  | 0.30154500  | 1.42621900  | 1.56246400  |
| C  | 1.11801100  | 0.70527800  | 0.72155600  |
| C  | 1.11795000  | -0.70538200 | 0.72154400  |
| C  | 0.30143700  | -1.42626000 | 1.56245700  |
| C  | -1.66854800 | -1.15427000 | -0.45777200 |
| C  | -1.66840800 | 1.15441000  | -0.45780500 |
| H  | 0.22940600  | 2.50272000  | 1.45751400  |
| H  | 0.22918000  | -2.50275200 | 1.45749000  |
| O  | -1.72267100 | 2.26760800  | -0.94097800 |
| O  | -1.72295900 | -2.26747200 | -0.94092000 |
| H  | 0.03081100  | -1.02491300 | 2.53108400  |
| H  | 0.03083900  | 1.02489200  | 2.53107700  |
| H  | -2.19551400 | -1.33422400 | 1.70392400  |
| H  | -2.19538300 | 1.33447800  | 1.70388100  |
| Cl | 1.98738500  | -1.60604200 | -0.57391900 |
| Cl | 1.98754200  | 1.60587700  | -0.57388300 |
| O  | -1.49367700 | 0.00005000  | -1.26245600 |

System 2 ( $\omega$ B97X-D/6-31G)

Reactant

|   |             |             |             |
|---|-------------|-------------|-------------|
| C | 1.36883300  | 0.89812700  | 1.45000000  |
| C | 2.11867700  | -0.11482900 | 1.00008100  |
| C | 0.02307300  | -2.62910900 | 0.50142900  |
| C | -0.69361700 | -1.75880000 | -0.22404500 |



|    |             |             |             |
|----|-------------|-------------|-------------|
| C  | -1.56514600 | -0.72480700 | 0.34244800  |
| C  | -1.64061700 | -0.30730900 | 1.60736100  |
| C  | 0.77168900  | 1.60625000  | 0.28657800  |
| C  | 2.05874400  | -0.13083000 | -0.48526300 |
| H  | 0.67387900  | -3.34690800 | 0.01458200  |
| H  | -2.31970800 | 0.47558300  | 1.91989800  |
| O  | 2.60930000  | -0.85045900 | -1.29225500 |
| O  | 0.06464600  | 2.58955600  | 0.23597600  |
| H  | -1.01953300 | -0.76616100 | 2.36963700  |
| H  | -0.02577900 | -2.67240400 | 1.58569100  |
| H  | 1.19186800  | 1.21450000  | 2.46588100  |
| H  | 2.70246000  | -0.82965700 | 1.55809800  |
| Cl | -2.62926400 | 0.08741100  | -0.89996700 |
| O  | 1.20704900  | 0.92792200  | -0.87905300 |
| H  | -0.62789500 | -1.78296500 | -1.30721200 |

Product

|   |             |             |             |
|---|-------------|-------------|-------------|
| C | 0.51247300  | 0.44586500  | 1.32424600  |
| C | 1.39015900  | -0.72474700 | 0.82748700  |
| C | 0.61252800  | -2.03081900 | 0.53268200  |
| C | -0.69274200 | -1.74177100 | -0.16962200 |
| C | -1.43066100 | -0.72975900 | 0.28032800  |
| C | -0.99884700 | 0.12033500  | 1.43940500  |
| C | 0.73527200  | 1.55193000  | 0.30567300  |
| C | 2.03880700  | -0.20378000 | -0.44377800 |
| H | 1.24070800  | -2.69448100 | -0.06653000 |
| H | -1.56512100 | 1.05283900  | 1.49307000  |
| O | 2.78614800  | -0.77751800 | -1.20826800 |
| O | 0.24073300  | 2.65869700  | 0.26274800  |
| H | -1.17140800 | -0.42061800 | 2.37809400  |
| H | 0.42231300  | -2.54098600 | 1.48565400  |

|    |             |             |             |
|----|-------------|-------------|-------------|
| H  | 0.86017100  | 0.82194500  | 2.29118000  |
| H  | 2.19589600  | -0.94400800 | 1.53513100  |
| Cl | -3.02955600 | -0.32781000 | -0.47538100 |
| O  | 1.64752100  | 1.12422900  | -0.67013000 |
| H  | -1.00062400 | -2.35706500 | -1.00628800 |

Transition state

|    |             |             |             |
|----|-------------|-------------|-------------|
| C  | 0.83574100  | 0.69385600  | 1.32917800  |
| C  | 1.68812700  | -0.30338900 | 0.86600000  |
| C  | 0.47949700  | -2.21378200 | 0.54608600  |
| C  | -0.57391400 | -1.73584500 | -0.20766100 |
| C  | -1.42299900 | -0.73804000 | 0.29684900  |
| C  | -1.25552800 | -0.13410800 | 1.52250000  |
| C  | 0.52732400  | 1.59494800  | 0.19445800  |
| C  | 1.92915800  | -0.07168300 | -0.57325800 |
| H  | 1.20124000  | -2.88477700 | 0.09223200  |
| H  | -1.84545200 | 0.73218600  | 1.79936200  |
| O  | 2.65909600  | -0.63228500 | -1.36825900 |
| O  | -0.08354200 | 2.64453800  | 0.14732400  |
| H  | -0.84330800 | -0.71111500 | 2.34240300  |
| H  | 0.44075000  | -2.23367800 | 1.62950100  |
| H  | 0.77271500  | 1.05517500  | 2.34462000  |
| H  | 2.39492000  | -0.86553900 | 1.45719800  |
| Cl | -2.60105500 | 0.00458200  | -0.86908600 |
| O  | 1.11056900  | 1.02102300  | -0.96344300 |
| H  | -0.63633500 | -1.98808900 | -1.26074500 |

System 3 ( $\omega$ B97X-D/6-31G(d))

Reactant

|   |             |            |            |
|---|-------------|------------|------------|
| C | -0.66578700 | 0.67237300 | 1.41402600 |
| C | 0.66569600  | 0.67248200 | 1.41402900 |

|   |             |             |             |
|---|-------------|-------------|-------------|
| C | 1.52996500  | -2.14167400 | 0.16176700  |
| C | 0.73454900  | -1.90150600 | -0.88707400 |
| C | -0.73427500 | -1.90155100 | -0.88707200 |
| C | -1.52967700 | -2.14198200 | 0.16171900  |
| C | -1.12387500 | 1.14375700  | 0.07979600  |
| C | 1.12371600  | 1.14393000  | 0.07979800  |
| H | 2.61027300  | -2.09320100 | 0.06419700  |
| H | -2.60998700 | -2.09353900 | 0.06415900  |
| O | 2.22819100  | 1.34059300  | -0.33151900 |
| O | -2.22837900 | 1.34025800  | -0.33152200 |
| H | -1.14294500 | -2.41161200 | 1.14170300  |
| H | 1.14324600  | -2.41109300 | 1.14181500  |
| H | -1.35870600 | 0.40858200  | 2.20091000  |
| H | 1.35865400  | 0.40880300  | 2.20091800  |
| O | -0.00009700 | 1.38471100  | -0.68786400 |
| H | -1.20034500 | -1.64810700 | -1.83723000 |
| H | 1.20060300  | -1.64821100 | -1.83727900 |

Product

|   |             |             |             |
|---|-------------|-------------|-------------|
| C | -0.76817300 | -0.11767800 | 0.95806300  |
| C | 0.76853000  | -0.11765500 | 0.95793600  |
| C | 1.41116600  | -1.41034900 | 0.41199700  |
| C | 0.66692100  | -1.90762600 | -0.79941600 |
| C | -0.66674100 | -1.90763200 | -0.79934300 |
| C | -1.41086100 | -1.41037200 | 0.41215900  |
| C | -1.13463100 | 1.06051100  | 0.07202500  |
| C | 1.13479300  | 1.06052000  | 0.07179800  |
| H | 2.46434100  | -1.21822300 | 0.19183000  |
| H | -2.46406000 | -1.21824500 | 0.19210600  |
| O | 2.22117000  | 1.44380700  | -0.24666000 |
| O | -2.22107800 | 1.44379300  | -0.24620000 |

|   |             |             |             |
|---|-------------|-------------|-------------|
| H | -1.38370100 | -2.16732800 | 1.20702600  |
| H | 1.38408400  | -2.16728700 | 1.20689100  |
| H | -1.17419100 | 0.09645000  | 1.95141800  |
| H | 1.17469200  | 0.09654700  | 1.95121800  |
| O | 0.00003300  | 1.69945200  | -0.36955400 |
| H | -1.23240200 | -2.26172000 | -1.65648000 |
| H | 1.23249200  | -2.26171700 | -1.65661100 |

Transition state

|   |             |             |             |
|---|-------------|-------------|-------------|
| C | 0.28887000  | 0.69175300  | 1.16644700  |
| C | 0.28879500  | -0.69178600 | 1.16644500  |
| C | -1.67758600 | -1.43227300 | 0.31474600  |
| C | -1.75301900 | -0.70370400 | -0.85201500 |
| C | -1.75294100 | 0.70388600  | -0.85202300 |
| C | -1.67743300 | 1.43245900  | 0.31473000  |
| C | 1.09387400  | 1.13031100  | 0.00630300  |
| C | 1.09375100  | -1.13042800 | 0.00629800  |
| H | -1.53569100 | -2.50838800 | 0.27514300  |
| H | -1.53541600 | 2.50855700  | 0.27511700  |
| O | 1.45290000  | -2.22159100 | -0.33365900 |
| O | 1.45314600  | 2.22143500  | -0.33365100 |
| H | -2.09584000 | 1.05349500  | 1.24139000  |
| H | -2.09594400 | -1.05325200 | 1.24140500  |
| H | 0.15766700  | 1.34081700  | 2.02116200  |
| H | 0.15752800  | -1.34083600 | 2.02116000  |
| O | 1.43128900  | -0.00007600 | -0.72092200 |
| H | -1.58835300 | 1.21436200  | -1.79755600 |
| H | -1.58849000 | -1.21420900 | -1.79754300 |

## System 4 ( $\omega$ B97X-D/6-31G(d))

### Reactant

|   |             |             |             |
|---|-------------|-------------|-------------|
| C | -0.02791800 | -0.91444500 | 1.40884100  |
| C | -1.21151600 | -0.30408900 | 1.41006200  |
| C | -0.64372800 | 2.59669600  | 0.24633600  |
| C | -0.09218500 | 2.04411100  | -0.84171200 |
| C | 1.16897700  | 1.29894200  | -0.90951800 |
| C | 2.03299300  | 1.10094800  | 0.09686300  |
| C | 0.16197900  | -1.54330800 | 0.07523600  |
| C | -1.83469900 | -0.51189100 | 0.07583000  |
| H | -1.59765700 | 3.11197100  | 0.18635900  |
| H | -0.63851600 | 2.11381600  | -1.78057500 |
| O | -2.90595700 | -0.17920600 | -0.33588000 |
| O | 1.05141500  | -2.22951100 | -0.33460800 |
| O | -0.94750300 | -1.24309000 | -0.69156500 |
| H | 1.83833000  | 1.55551800  | 1.06868800  |
| H | -0.16378200 | 2.57644500  | 1.22185700  |
| H | -1.70671600 | 0.24707900  | 2.19744900  |
| H | 0.70817600  | -0.99898100 | 2.19671700  |
| H | 1.39422700  | 0.84583000  | -1.87418400 |
| C | 3.28495400  | 0.28937400  | -0.01006200 |
| H | 4.16533900  | 0.89289500  | 0.24430000  |
| H | 3.26572300  | -0.55681100 | 0.68787800  |
| H | 3.41978700  | -0.11271300 | -1.01875600 |

### Product

|   |             |             |             |
|---|-------------|-------------|-------------|
| C | 0.52597900  | -0.24631600 | 0.90269700  |
| C | -0.86061600 | 0.41895800  | 0.96814600  |
| C | -0.89737700 | 1.88475300  | 0.48469500  |
| C | -0.09042700 | 2.03027000  | -0.77778600 |
| C | 1.11156600  | 1.45587700  | -0.83879100 |

|   |             |             |             |
|---|-------------|-------------|-------------|
| C | 1.63547600  | 0.70279700  | 0.36106900  |
| C | 0.30191300  | -1.46137000 | 0.01821600  |
| C | -1.72272100 | -0.43292100 | 0.05397500  |
| H | -1.93810500 | 2.18594700  | 0.34288400  |
| H | -0.50404500 | 2.58327700  | -1.61612100 |
| O | -2.86897900 | -0.27636200 | -0.24767900 |
| O | 1.06526700  | -2.33221800 | -0.27938100 |
| O | -0.99724100 | -1.48878900 | -0.43839900 |
| H | 1.78713000  | 1.42999700  | 1.17279400  |
| H | -0.48270000 | 2.52023700  | 1.27853400  |
| H | -1.29411500 | 0.35304300  | 1.97088000  |
| H | 0.84377300  | -0.62631900 | 1.87883300  |
| H | 1.73110300  | 1.51682900  | -1.73060900 |
| C | 2.97401400  | 0.01442000  | 0.10339300  |
| H | 3.73473800  | 0.76771000  | -0.12764200 |
| H | 3.30897800  | -0.54741700 | 0.98130800  |
| H | 2.91722400  | -0.68257300 | -0.73651400 |

Transition state

|   |             |             |             |
|---|-------------|-------------|-------------|
| C | 0.14378000  | -0.58132900 | 1.16592200  |
| C | -1.05767400 | 0.10924300  | 1.15417000  |
| C | -0.77708300 | 2.10369500  | 0.39522700  |
| C | -0.15378900 | 1.87409300  | -0.81896700 |
| C | 1.09476200  | 1.23855800  | -0.91683500 |
| C | 1.81339500  | 0.82662400  | 0.18554000  |
| C | 0.14832100  | -1.49350100 | 0.01820800  |
| C | -1.83689700 | -0.41117200 | 0.00036400  |
| H | -1.78846300 | 2.50057800  | 0.40623700  |
| H | -0.73885900 | 1.98246800  | -1.72892700 |
| O | -2.96836000 | -0.19973100 | -0.33316600 |
| O | 0.92522500  | -2.34227300 | -0.32236300 |

|   |             |             |             |
|---|-------------|-------------|-------------|
| O | -1.01272500 | -1.25101500 | -0.71687700 |
| H | 1.65448200  | 1.33161300  | 1.13409500  |
| H | -0.19423600 | 2.31789400  | 1.28597200  |
| H | -1.57585500 | 0.49791000  | 2.02106400  |
| H | 0.80292100  | -0.73542700 | 2.00819900  |
| H | 1.41659300  | 0.89578400  | -1.89832100 |
| C | 3.06853000  | 0.01839500  | 0.07933800  |
| H | 3.94215100  | 0.68265300  | 0.11562300  |
| H | 3.16286700  | -0.68654300 | 0.91074400  |
| H | 3.10520800  | -0.55041600 | -0.85323600 |

### System 5 ( $\omega$ B97X-D/6-31G)

#### Reactant

|   |             |             |             |
|---|-------------|-------------|-------------|
| C | -0.64303000 | -0.07902800 | 1.26560400  |
| C | -1.13649900 | 2.26302300  | -1.03696600 |
| C | 1.19396000  | 2.45559000  | -0.73644400 |
| C | 0.68320900  | -0.10856400 | 1.42745800  |
| H | -1.24952600 | 0.65286200  | 1.78182600  |
| H | 1.16173600  | 0.60496600  | 2.09031400  |
| C | 0.16954900  | 1.73759600  | -1.57413000 |
| H | 0.28833400  | 1.95856600  | -2.64522300 |
| H | 0.26643100  | 0.64872300  | -1.46795800 |
| C | -0.88767500 | 3.15682400  | -0.05183300 |
| C | 0.56577100  | 3.27598300  | 0.13658700  |
| H | -2.10701900 | 1.95933200  | -1.40667900 |
| H | 2.25992000  | 2.30675100  | -0.84041100 |
| C | -1.35066000 | -1.01358300 | 0.37593800  |
| O | -0.82086300 | -1.86285700 | -0.35137800 |
| O | -2.69760600 | -0.84214200 | 0.44274000  |
| C | -3.52073600 | -1.71765000 | -0.38731000 |

|   |             |             |             |
|---|-------------|-------------|-------------|
| H | -3.34776100 | -2.76244100 | -0.12296200 |
| H | -4.54617100 | -1.42825300 | -0.17017500 |
| H | -3.28953800 | -1.56419300 | -1.44321500 |
| C | 1.59416100  | -1.12059900 | 0.82332200  |
| O | 1.97975400  | -2.13041400 | 1.41143600  |
| O | 2.02274000  | -0.76444700 | -0.41306700 |
| C | 2.85547000  | -1.72976300 | -1.12919700 |
| H | 2.29770100  | -2.65521100 | -1.28077800 |
| H | 3.07987700  | -1.25273100 | -2.08029000 |
| H | 3.77048000  | -1.93338100 | -0.57027300 |
| H | 1.03768600  | 3.92244200  | 0.86589400  |
| H | -1.62676500 | 3.70463600  | 0.51920800  |

Product

|   |             |             |             |
|---|-------------|-------------|-------------|
| C | -0.91005500 | 0.65996800  | 0.41474400  |
| C | -0.99840500 | 1.87163800  | -0.59855500 |
| C | 1.21517900  | 1.75558000  | -0.17687800 |
| C | 0.64581000  | 0.58358000  | 0.69379700  |
| H | -1.45488400 | 0.87920400  | 1.33196800  |
| H | 0.81818600  | 0.76884000  | 1.75874500  |
| C | 0.29811800  | 1.66713800  | -1.42094800 |
| H | 0.47223400  | 2.48072500  | -2.12950000 |
| H | 0.34401700  | 0.70239000  | -1.92892000 |
| C | -0.62602800 | 3.10555300  | 0.21688000  |
| C | 0.69041700  | 3.03585400  | 0.46735800  |
| H | -1.94121900 | 1.91288300  | -1.14339500 |
| H | 2.28805300  | 1.69552000  | -0.34151700 |
| C | -1.49767500 | -0.59042500 | -0.18376400 |
| O | -1.13307500 | -1.13433900 | -1.23108700 |
| O | -2.54137500 | -1.05487900 | 0.55068700  |
| C | -3.18395100 | -2.28311300 | 0.08842600  |



|   |             |             |             |
|---|-------------|-------------|-------------|
| H | -2.45716300 | -3.09688700 | 0.06273100  |
| H | -3.96431100 | -2.48397400 | 0.81872800  |
| H | -3.61041000 | -2.13851600 | -0.90594800 |
| C | 1.22813500  | -0.78369600 | 0.42368000  |
| O | 0.89866700  | -1.79896700 | 1.04355600  |
| O | 2.17894100  | -0.79626700 | -0.54334500 |
| C | 2.74761900  | -2.09461000 | -0.89702900 |
| H | 1.95956300  | -2.75959300 | -1.25407900 |
| H | 3.46286100  | -1.88152900 | -1.68811000 |
| H | 3.24398100  | -2.54042500 | -0.03323600 |
| H | 1.28214100  | 3.70087000  | 1.08392000  |
| H | -1.33548900 | 3.83550000  | 0.58558100  |

Transition state

|   |             |             |             |
|---|-------------|-------------|-------------|
| C | -0.72073000 | 0.20044600  | 0.96322800  |
| C | -1.13581300 | 1.91008600  | -0.71859200 |
| C | 1.14051600  | 1.92025600  | -0.27534000 |
| C | 0.66686000  | 0.34833200  | 1.07228700  |
| H | -1.36738000 | 0.70125600  | 1.66820300  |
| H | 1.01943300  | 0.84430300  | 1.97085300  |
| C | 0.15619500  | 1.44292700  | -1.32333200 |
| H | 0.34116800  | 2.01817400  | -2.24595500 |
| H | 0.21415300  | 0.38534900  | -1.57280100 |
| C | -0.85413100 | 2.96537700  | 0.14685600  |
| C | 0.53157800  | 2.99789300  | 0.39132900  |
| H | -2.11471300 | 1.65796800  | -1.10527000 |
| H | 2.20988200  | 1.79968700  | -0.38694100 |
| C | -1.33532100 | -0.86256900 | 0.18610700  |
| O | -0.75728800 | -1.64260200 | -0.59088700 |
| O | -2.68819000 | -0.92978900 | 0.39473700  |
| C | -3.41172500 | -1.97174400 | -0.32120600 |

|   |             |             |             |
|---|-------------|-------------|-------------|
| H | -3.02968000 | -2.95835400 | -0.05132100 |
| H | -4.44782000 | -1.86263200 | -0.00721800 |
| H | -3.31947000 | -1.83138300 | -1.40034300 |
| C | 1.59561400  | -0.76985500 | 0.69086200  |
| O | 1.89862800  | -1.66019700 | 1.48922900  |
| O | 2.12036200  | -0.71035700 | -0.55891200 |
| C | 2.90213300  | -1.86225400 | -0.99691800 |
| H | 2.27892800  | -2.75766100 | -0.97866200 |
| H | 3.20606000  | -1.62408600 | -2.01376400 |
| H | 3.77258400  | -2.00244200 | -0.35353700 |
| H | 1.02874800  | 3.66538900  | 1.08337600  |
| H | -1.59105500 | 3.59461300  | 0.62836500  |

#### System 6 (M06-2X/6-31+G(d))

##### Reactant

|   |             |             |             |
|---|-------------|-------------|-------------|
| C | 2.22020200  | -0.77368700 | 0.56289500  |
| C | 2.27981200  | 0.52072800  | 0.17891600  |
| C | 1.53340800  | 0.68758700  | -1.07145400 |
| C | 1.02284700  | -0.50537200 | -1.44443200 |
| H | 2.68859300  | -1.21291800 | 1.43715700  |
| H | 2.79403500  | 1.32180400  | 0.70001100  |
| H | 1.40956800  | 1.63045900  | -1.59317400 |
| H | 0.42147600  | -0.70866700 | -2.32378000 |
| C | -0.48389800 | -0.04325100 | 1.86281300  |
| H | 0.03132500  | 0.75747900  | 2.38145900  |
| H | -0.42651700 | -1.04727300 | 2.27068400  |
| C | -1.28670600 | 1.53877000  | 0.20884700  |
| C | -1.89810600 | -0.83988100 | 0.05704900  |
| N | -1.34442200 | 2.61396000  | -0.21319900 |
| N | -2.44873600 | -1.69924400 | -0.48740300 |
| C | -1.20314500 | 0.20948800  | 0.75846500  |

|   |            |             |             |
|---|------------|-------------|-------------|
| C | 1.43977200 | -1.55452100 | -0.45555400 |
| H | 2.07227400 | -2.31720900 | -0.93457100 |
| H | 0.58739100 | -2.10096500 | -0.02743300 |

Product

|   |             |             |             |
|---|-------------|-------------|-------------|
| C | 1.59437600  | -0.65125500 | 0.90091600  |
| C | 2.19816200  | 0.57487100  | 0.24253600  |
| C | 1.54237000  | 0.78747600  | -0.90470600 |
| C | 0.49551300  | -0.30176800 | -1.03297200 |
| H | 2.19855500  | -1.14534500 | 1.66237700  |
| H | 2.94877500  | 1.21459000  | 0.69501000  |
| H | 1.63537100  | 1.63193200  | -1.57848100 |
| H | 0.05280700  | -0.46315800 | -2.01575700 |
| C | 0.19118300  | -0.21866700 | 1.41828500  |
| H | 0.21981300  | 0.68356500  | 2.03157200  |
| H | -0.28772600 | -1.01652900 | 1.99101600  |
| C | -1.10027500 | 1.40588900  | -0.04403500 |
| C | -1.73460400 | -0.89863900 | -0.05159500 |
| N | -1.46205500 | 2.49890900  | -0.14157100 |
| N | -2.59390900 | -1.66323100 | -0.16323100 |
| C | -0.60085700 | 0.02940600  | 0.07631400  |
| C | 1.20216400  | -1.47736700 | -0.33839300 |
| H | 2.06613000  | -1.82288700 | -0.91039200 |
| H | 0.54024200  | -2.32109600 | -0.11454800 |

Transition state

|   |            |             |             |
|---|------------|-------------|-------------|
| C | 1.66757500 | -0.58288200 | 0.82638300  |
| C | 2.04496200 | 0.64861400  | 0.27737400  |
| C | 1.50743200 | 0.76952300  | -1.02553000 |
| C | 0.87073600 | -0.40631900 | -1.34913900 |
| H | 2.13657600 | -0.99933000 | 1.71295300  |

|   |             |             |             |
|---|-------------|-------------|-------------|
| H | 2.56529600  | 1.43631600  | 0.81272900  |
| H | 1.52132500  | 1.67082400  | -1.62703000 |
| H | 0.32789000  | -0.60874300 | -2.26649100 |
| C | -0.14439600 | -0.12269400 | 1.56468600  |
| H | 0.13066300  | 0.71263300  | 2.19921700  |
| H | -0.25597500 | -1.06968200 | 2.08590200  |
| C | -1.24670100 | 1.47045400  | 0.06697700  |
| C | -1.84332900 | -0.90234200 | -0.04581700 |
| N | -1.38055800 | 2.57831600  | -0.25287600 |
| N | -2.48662300 | -1.77064800 | -0.47085800 |
| C | -1.02727000 | 0.13009100  | 0.50310700  |
| C | 1.19869200  | -1.44147800 | -0.32604500 |
| H | 2.07121500  | -2.01002800 | -0.68769700 |
| H | 0.40706400  | -2.16346100 | -0.11542500 |

#### System 7 ( $\omega$ B97X-D/6-31G(d))

##### Reactant

|   |             |             |             |
|---|-------------|-------------|-------------|
| C | 0.49143400  | -0.72660400 | -1.31553700 |
| C | -1.17173300 | 1.37907800  | 0.74027500  |
| C | -2.66734300 | -0.43229500 | 0.72153200  |
| C | -0.35723800 | -1.74691900 | -1.21336300 |
| H | 0.44701500  | -0.01673900 | -2.13470200 |
| H | -1.13489100 | -1.91294700 | -1.95145200 |
| H | -0.29098300 | -2.44778500 | -0.38595900 |
| C | -1.49918800 | 0.11894300  | 1.48438200  |
| H | -1.75864800 | 0.32191000  | 2.53368900  |
| H | -0.64843000 | -0.57578200 | 1.50682000  |
| C | -2.03576700 | 1.52980300  | -0.28144300 |
| C | -2.96964400 | 0.40128800  | -0.29203200 |
| H | -0.36152500 | 2.04680100  | 1.00952500  |
| H | -3.17728900 | -1.35331200 | 0.97921500  |

|   |             |             |             |
|---|-------------|-------------|-------------|
| C | 1.54534300  | -0.51498200 | -0.29735400 |
| O | 1.68525300  | -1.15949500 | 0.72224800  |
| O | 2.35650400  | 0.49496100  | -0.64564000 |
| C | 3.41796700  | 0.77299900  | 0.26689100  |
| H | 4.07238200  | -0.09568700 | 0.37696800  |
| H | 3.96959400  | 1.60722500  | -0.16714100 |
| H | 3.02290100  | 1.05081700  | 1.24778700  |
| H | -3.76962600 | 0.27215600  | -1.01342800 |
| H | -2.05089200 | 2.34705700  | -0.99473800 |

Product

|   |             |             |             |
|---|-------------|-------------|-------------|
| C | -0.00512100 | -0.01510900 | -0.61008500 |
| C | -0.79591800 | 0.97866000  | 0.33133100  |
| C | -2.12447800 | -0.83048100 | 0.27587200  |
| C | -0.91894900 | -1.26663100 | -0.61382600 |
| H | 0.11527200  | 0.43040600  | -1.59955300 |
| H | -1.22838600 | -1.54674200 | -1.62385500 |
| H | -0.40041200 | -2.11620800 | -0.16175000 |
| C | -1.38795500 | -0.01040000 | 1.35166600  |
| H | -2.06672600 | 0.47527500  | 2.05838900  |
| H | -0.63106000 | -0.58615800 | 1.89365600  |
| C | -2.04263100 | 1.35644500  | -0.44599100 |
| C | -2.83446900 | 0.28058100  | -0.47675300 |
| H | -0.19033800 | 1.80306600  | 0.71117300  |
| H | -2.74657000 | -1.65905100 | 0.61784700  |
| C | 1.37255500  | -0.27347700 | -0.04511100 |
| O | 1.68205000  | -1.16708000 | 0.71237300  |
| O | 2.23932700  | 0.66543600  | -0.45692800 |
| C | 3.56084900  | 0.56029000  | 0.07321500  |
| H | 4.01926000  | -0.38998600 | -0.21282000 |
| H | 4.11896100  | 1.39178500  | -0.35812400 |

|   |             |            |             |
|---|-------------|------------|-------------|
| H | 3.54936500  | 0.63890400 | 1.16354600  |
| H | -3.76061600 | 0.16214700 | -1.02935300 |
| H | -2.18083600 | 2.29664400 | -0.96902900 |

Transition state

|   |             |             |             |
|---|-------------|-------------|-------------|
| C | 0.17638800  | -0.38767800 | -0.96467700 |
| C | -0.95501900 | 1.20035500  | 0.52716600  |
| C | -2.26043100 | -0.69920800 | 0.40234300  |
| C | -0.74835900 | -1.41636700 | -0.84984000 |
| H | 0.15660800  | 0.28939100  | -1.80917000 |
| H | -1.37759900 | -1.65857700 | -1.69885100 |
| H | -0.49648000 | -2.25817300 | -0.20995800 |
| C | -1.29786800 | -0.01068400 | 1.33597900  |
| H | -1.86551500 | 0.31898100  | 2.22117500  |
| H | -0.45084600 | -0.60573600 | 1.67850000  |
| C | -1.99845800 | 1.43822400  | -0.35231400 |
| C | -2.81642900 | 0.29869600  | -0.40507000 |
| H | -0.18761900 | 1.91505100  | 0.80159600  |
| H | -2.78403700 | -1.61084500 | 0.67263000  |
| C | 1.40023900  | -0.39201000 | -0.16427400 |
| O | 1.64452700  | -1.12948100 | 0.77595300  |
| O | 2.27405000  | 0.54580500  | -0.59031900 |
| C | 3.49731400  | 0.61344900  | 0.13476100  |
| H | 4.04343000  | -0.33219900 | 0.07447500  |
| H | 4.07663400  | 1.40950300  | -0.33527300 |
| H | 3.31785900  | 0.85222600  | 1.18709100  |
| H | -3.65983100 | 0.16380000  | -1.07367200 |
| H | -2.10548000 | 2.31733000  | -0.97805900 |

System 8 ( $\omega$ B97X-D/6-31G)

Reactant

|   |             |             |             |
|---|-------------|-------------|-------------|
| C | -3.80251600 | -0.93031500 | -0.54287700 |
| C | -2.54630500 | -1.40855300 | -0.79059200 |
| C | -1.37797300 | -0.58307400 | -0.65129600 |
| C | -1.56398000 | 0.78675400  | -0.23562400 |
| C | -2.90390400 | 1.24278400  | 0.01328500  |
| C | -3.98493500 | 0.41965400  | -0.13360600 |
| C | -0.07997300 | -1.07584200 | -0.91216400 |
| C | -0.45222300 | 1.64435700  | -0.08579700 |
| C | 0.82646400  | 1.18676100  | -0.47481700 |
| C | 1.01247500  | -0.18059200 | -0.88643900 |
| C | 2.33378700  | -0.60464100 | -1.25543100 |
| H | 2.49348300  | -1.62892900 | -1.56596700 |
| C | 3.39571700  | 0.25521300  | -1.23520900 |
| C | 3.21028700  | 1.60850400  | -0.84000400 |
| C | 1.97123000  | 2.05416400  | -0.47189600 |
| H | -4.66569800 | -1.57487500 | -0.66953300 |
| H | -2.43633500 | -2.43111600 | -1.12828900 |
| H | -3.06762100 | 2.27499000  | 0.29664900  |
| H | -4.98599500 | 0.79581300  | 0.04814800  |
| H | 4.38270900  | -0.09112100 | -1.52110600 |
| H | 4.05622400  | 2.28758000  | -0.83782600 |
| H | 1.84851800  | 3.09434000  | -0.19678100 |
| C | 0.11655100  | 0.18359500  | 2.69821400  |
| C | 0.24082800  | -1.11453800 | 2.39535500  |
| C | 0.16122700  | -2.53414200 | -1.23099500 |
| H | -0.65395100 | -3.17327100 | -0.89037000 |
| H | 0.28446100  | -2.70077400 | -2.30864800 |
| H | 1.06483600  | -2.89877700 | -0.73418000 |
| C | -0.62466900 | 3.04202400  | 0.46616600  |
| H | 0.25306300  | 3.35877000  | 1.03428800  |
| H | -0.78748400 | 3.78063100  | -0.32918900 |

|   |             |             |            |
|---|-------------|-------------|------------|
| H | -1.47144200 | 3.10503600  | 1.15250400 |
| H | 0.96866200  | 0.85417000  | 2.71909800 |
| H | -0.85505600 | 0.60217600  | 2.93304400 |
| H | -0.62155300 | -1.77253400 | 2.36789000 |
| C | 1.49392200  | -1.71784500 | 2.06642800 |
| N | 2.50758200  | -2.22834700 | 1.77925100 |

Product

|   |             |             |             |
|---|-------------|-------------|-------------|
| C | -3.63039600 | -0.67515000 | -1.14230400 |
| C | -2.40363700 | -1.32197900 | -0.95776500 |
| C | -1.34867000 | -0.64313600 | -0.35329000 |
| C | -1.51822800 | 0.68590300  | 0.07459200  |
| C | -2.74155700 | 1.32510300  | -0.10800300 |
| C | -3.79828200 | 0.64208400  | -0.71987500 |
| C | 0.03587700  | -1.22436500 | -0.06812800 |
| C | -0.28875900 | 1.28043600  | 0.75727700  |
| C | 0.89027900  | 1.08305700  | -0.19405400 |
| C | 1.06409000  | -0.24387600 | -0.62787500 |
| C | 2.13037800  | -0.57388300 | -1.45940500 |
| H | 2.27713200  | -1.59566300 | -1.79077100 |
| C | 3.02513700  | 0.42089900  | -1.86726600 |
| C | 2.85279000  | 1.73587100  | -1.43994500 |
| C | 1.78509800  | 2.06938000  | -0.59970400 |
| H | -4.45038300 | -1.20241000 | -1.61793900 |
| H | -2.28381100 | -2.34668100 | -1.29123800 |
| H | -2.88209500 | 2.34990100  | 0.21750500  |
| H | -4.74963800 | 1.14241100  | -0.86614800 |
| H | 3.85614700  | 0.16412800  | -2.51527300 |
| H | 3.54860500  | 2.50540100  | -1.75686800 |
| H | 1.66288800  | 3.09495200  | -0.26929000 |
| C | 0.00117300  | 0.34614900  | 1.98286200  |



|   |             |             |             |
|---|-------------|-------------|-------------|
| C | 0.18098200  | -1.13010700 | 1.51329100  |
| C | 0.21128000  | -2.66159700 | -0.54684900 |
| H | -0.52289200 | -3.32043500 | -0.07132100 |
| H | 0.08172600  | -2.73079200 | -1.63155300 |
| H | 1.20732600  | -3.04089000 | -0.29927600 |
| C | -0.47389500 | 2.71855600  | 1.23030500  |
| H | 0.42496200  | 3.07334000  | 1.74508100  |
| H | -0.67740800 | 3.39351300  | 0.39227900  |
| H | -1.30861000 | 2.78769100  | 1.93581300  |
| H | 0.90171400  | 0.70588700  | 2.48909700  |
| H | -0.83234700 | 0.41462500  | 2.68810500  |
| H | -0.60662300 | -1.75831800 | 1.94447000  |
| C | 1.46883600  | -1.67654800 | 1.94185600  |
| N | 2.50497900  | -2.11001600 | 2.26479800  |

Transition state

|   |             |             |             |
|---|-------------|-------------|-------------|
| C | -3.77067100 | -0.88041200 | -0.73873400 |
| C | -2.50810900 | -1.43105600 | -0.79951200 |
| C | -1.35899100 | -0.65190100 | -0.50451000 |
| C | -1.52712200 | 0.70627600  | -0.12118600 |
| C | -2.83603500 | 1.24119200  | -0.04802000 |
| C | -3.93578700 | 0.46806800  | -0.36106300 |
| C | -0.02682900 | -1.19450600 | -0.53479000 |
| C | -0.34791700 | 1.44940300  | 0.28259300  |
| C | 0.89088200  | 1.07743300  | -0.37065600 |
| C | 1.05878700  | -0.28233900 | -0.75519200 |
| C | 2.31526400  | -0.70379700 | -1.26533400 |
| H | 2.45988800  | -1.73932200 | -1.54744500 |
| C | 3.34753100  | 0.19397600  | -1.42856100 |
| C | 3.17306800  | 1.54521800  | -1.06603400 |
| C | 1.97406100  | 1.97417000  | -0.53447600 |

|   |             |             |             |
|---|-------------|-------------|-------------|
| H | -4.63802800 | -1.48126000 | -0.98960900 |
| H | -2.39254800 | -2.46412000 | -1.10584000 |
| H | -2.97871900 | 2.27818800  | 0.23194600  |
| H | -4.93009500 | 0.89993600  | -0.32382000 |
| H | 4.29643400  | -0.13843900 | -1.83434100 |
| H | 3.98616600  | 2.24962300  | -1.20493700 |
| H | 1.85746500  | 3.01608700  | -0.26095600 |
| C | -0.02448400 | 0.45268900  | 2.09974600  |
| C | 0.17240300  | -0.92030300 | 1.90879200  |
| C | 0.18240600  | -2.67280800 | -0.73338600 |
| H | -0.58501300 | -3.25629100 | -0.21933100 |
| H | 0.15174500  | -2.94047500 | -1.79784200 |
| H | 1.15064300  | -2.98957600 | -0.33734000 |
| C | -0.51848800 | 2.87422900  | 0.76579300  |
| H | 0.37596400  | 3.22622800  | 1.28556100  |
| H | -0.71500800 | 3.55757400  | -0.06953700 |
| H | -1.34980800 | 2.95674700  | 1.47075900  |
| H | 0.82646000  | 1.06724900  | 2.37827500  |
| H | -0.97515200 | 0.77310300  | 2.51342600  |
| H | -0.65557600 | -1.61082800 | 2.02068900  |
| C | 1.46717300  | -1.49790500 | 1.93827000  |
| N | 2.53604600  | -1.98431200 | 1.91255700  |

### System 9 ( $\omega$ B97X-D/6-31G(d))

#### Reactant

|   |             |             |             |
|---|-------------|-------------|-------------|
| C | 1.12937500  | -0.68478100 | 0.60033600  |
| C | -0.76456200 | -1.47727700 | -1.69204100 |
| C | -0.72001200 | 1.46477700  | -1.67671600 |
| C | 1.10542000  | 0.67713900  | 0.63899200  |
| C | -1.69937600 | -0.73923400 | -1.06744000 |
| C | -1.69656300 | 0.74981000  | -1.09055400 |

|   |             |             |             |
|---|-------------|-------------|-------------|
| H | -0.78665800 | -2.56220500 | -1.63997900 |
| C | 0.24512000  | -1.46384700 | 1.41326500  |
| N | -0.46160200 | -2.07958600 | 2.09302600  |
| C | 2.07519700  | -1.38829100 | -0.21313800 |
| N | 2.84590800  | -1.95508100 | -0.86488300 |
| C | 2.03649300  | 1.45719800  | -0.11948900 |
| N | 2.79916900  | 2.08090200  | -0.72727400 |
| C | 0.17974700  | 1.37850200  | 1.47689900  |
| N | -0.56584400 | 1.93655400  | 2.16481500  |
| H | 0.10108700  | 1.01410300  | -2.22594600 |
| H | 0.01492500  | -1.04912900 | -2.31492300 |
| C | -2.81896500 | 1.46350200  | -0.38137100 |
| H | -2.85652500 | 1.20233600  | 0.68255700  |
| H | -2.69999300 | 2.54727400  | -0.45374800 |
| H | -3.79187000 | 1.19909900  | -0.81207100 |
| C | -2.78296800 | -1.42506900 | -0.27475700 |
| H | -2.76791800 | -1.12293100 | 0.77878500  |
| H | -3.77676100 | -1.17745500 | -0.66570800 |
| H | -2.66609700 | -2.51081500 | -0.31150900 |
| H | -0.74180600 | 2.55088200  | -1.66555700 |

Product

|   |             |             |             |
|---|-------------|-------------|-------------|
| C | 0.70002000  | -0.83007500 | 0.01144500  |
| C | -0.45794900 | -1.39831500 | -0.88758500 |
| C | -0.33243600 | 1.28829000  | -1.02917300 |
| C | 0.59790600  | 0.76682100  | 0.11030100  |
| C | -1.75949600 | -0.65038700 | -0.71960900 |
| C | -1.70666200 | 0.68320100  | -0.84266600 |
| H | -0.56455600 | -2.46146400 | -0.65984600 |
| C | 0.62681100  | -1.44575600 | 1.34811200  |
| N | 0.53911000  | -1.96031000 | 2.37921300  |

|   |             |             |             |
|---|-------------|-------------|-------------|
| C | 1.97735400  | -1.23329300 | -0.60294700 |
| N | 2.94598800  | -1.57535800 | -1.13249000 |
| C | 1.92365800  | 1.40146400  | 0.01630000  |
| N | 2.94340300  | 1.93476200  | -0.09017500 |
| C | -0.00655600 | 1.18015800  | 1.39167000  |
| N | -0.50763900 | 1.55176900  | 2.36455900  |
| H | 0.12943000  | 1.01647700  | -1.98652500 |
| H | -0.11376800 | -1.32788900 | -1.92613700 |
| C | -2.84474400 | 1.65106100  | -0.71704900 |
| H | -2.70421500 | 2.28623000  | 0.16706000  |
| H | -2.88230200 | 2.31528200  | -1.58905400 |
| H | -3.81495600 | 1.15951700  | -0.62617900 |
| C | -2.97180600 | -1.48913400 | -0.44673000 |
| H | -2.85388100 | -2.02230500 | 0.50504000  |
| H | -3.89171200 | -0.90459600 | -0.39286400 |
| H | -3.09949800 | -2.24986200 | -1.22679400 |
| H | -0.35874500 | 2.37904600  | -0.97586800 |

Transition state

|   |             |             |             |
|---|-------------|-------------|-------------|
| C | 0.97625900  | -0.71251200 | 0.32059800  |
| C | -0.46554800 | -1.40207500 | -1.32915000 |
| C | -0.44785000 | 1.38934100  | -1.31980000 |
| C | 0.94646200  | 0.71293600  | 0.34151500  |
| C | -1.60266100 | -0.71183000 | -0.94589800 |
| C | -1.59903400 | 0.70990300  | -0.95430100 |
| H | -0.42885200 | -2.48222500 | -1.21436300 |
| C | 0.28778400  | -1.43637200 | 1.35242600  |
| N | -0.29829900 | -2.00961400 | 2.17150800  |
| C | 2.10106600  | -1.37682700 | -0.27518500 |
| N | 2.98881600  | -1.91638900 | -0.78795400 |
| C | 2.06405400  | 1.44165100  | -0.19137500 |

|   |             |             |             |
|---|-------------|-------------|-------------|
| N | 2.94695100  | 2.03437800  | -0.65068100 |
| C | 0.20976600  | 1.37055600  | 1.38608700  |
| N | -0.41599800 | 1.89065300  | 2.21093500  |
| H | 0.26784300  | 0.97586100  | -2.02134800 |
| H | 0.23955500  | -0.99870200 | -2.04687300 |
| C | -2.73876400 | 1.46106000  | -0.32505300 |
| H | -2.86580000 | 1.17994200  | 0.72751300  |
| H | -2.57721500 | 2.54002600  | -0.36941400 |
| H | -3.68108800 | 1.23422400  | -0.83706700 |
| C | -2.73208900 | -1.44771800 | -0.27975200 |
| H | -2.79736600 | -1.18585000 | 0.78378600  |
| H | -3.69298100 | -1.18690300 | -0.73708300 |
| H | -2.60077700 | -2.52920200 | -0.35268400 |
| H | -0.41029100 | 2.47095600  | -1.21978600 |

### System 10 (B3LYP/6-31+G(d))

#### Reactant

|   |             |             |             |
|---|-------------|-------------|-------------|
| C | -1.42538500 | 0.67338700  | -1.75534700 |
| C | -1.46219200 | -0.66348000 | -1.77805600 |
| C | 2.06894900  | -1.45714400 | -0.91183700 |
| C | 2.39360000  | -0.72936500 | 0.17102900  |
| C | 2.37323100  | 0.76258000  | 0.14518600  |
| H | 2.10413600  | -2.54374900 | -0.89580300 |
| C | 2.80534700  | 1.45380500  | -0.92411100 |
| H | 2.76812000  | 2.54041400  | -0.94686300 |
| C | -1.68666300 | 1.13678100  | -0.35057700 |
| C | -1.75218600 | -1.15814800 | -0.38926700 |
| O | -1.87725300 | -2.30640500 | -0.00862200 |
| O | -1.73747000 | 2.27936200  | 0.06397400  |
| H | -1.23987600 | 1.37353500  | -2.56009900 |
| H | -1.31818700 | -1.34413100 | -2.60763400 |

|   |             |             |             |
|---|-------------|-------------|-------------|
| N | -1.86898400 | -0.02053300 | 0.41387100  |
| C | -2.17994900 | -0.04536400 | 1.83312100  |
| H | -3.16147000 | -0.49894100 | 2.00238500  |
| H | -1.42689800 | -0.62327500 | 2.37670700  |
| H | -2.18543600 | 0.98645800  | 2.18923300  |
| H | 1.75087800  | -0.98988300 | -1.83947100 |
| H | 3.22468200  | 0.95805300  | -1.79527200 |
| C | 1.87475100  | 1.47628900  | 1.38432000  |
| H | 1.82107700  | 2.55642100  | 1.22022200  |
| H | 0.87504600  | 1.12920500  | 1.67519800  |
| H | 2.53655500  | 1.29744600  | 2.24187200  |
| C | 2.78053300  | -1.39983100 | 1.47217800  |
| H | 3.76519600  | -1.05760700 | 1.81812300  |
| H | 2.06533700  | -1.17165900 | 2.27292400  |

Product

|   |             |             |             |
|---|-------------|-------------|-------------|
| C | -0.24704900 | 0.76525900  | -1.24992300 |
| C | -0.28642100 | -0.77952500 | -1.22219800 |
| C | 1.07847400  | -1.42511300 | -0.89311900 |
| C | 1.80089300  | -0.70863900 | 0.23696400  |
| C | 1.83528700  | 0.63966900  | 0.21287200  |
| H | 0.91631000  | -2.48023700 | -0.64781900 |
| C | 1.14958200  | 1.35119000  | -0.94297200 |
| H | 1.04249300  | 2.42148200  | -0.73645000 |
| C | -1.26947300 | 1.20167500  | -0.19965300 |
| C | -1.32860500 | -1.12083900 | -0.15696600 |
| O | -1.66731600 | -2.23050000 | 0.21307500  |
| O | -1.54519300 | 2.34302500  | 0.12175400  |
| H | -0.59446700 | 1.16167600  | -2.21174500 |
| H | -0.65480500 | -1.19153300 | -2.16956100 |
| N | -1.85691100 | 0.06281600  | 0.34695700  |

|   |             |             |             |
|---|-------------|-------------|-------------|
| C | -2.87999000 | 0.09430700  | 1.38254100  |
| H | -3.74265500 | -0.49840600 | 1.06705900  |
| H | -2.48799900 | -0.32585000 | 2.31374200  |
| H | -3.16768700 | 1.13546200  | 1.53512200  |
| H | 1.69524100  | -1.40753200 | -1.80500100 |
| H | 1.76358100  | 1.26845300  | -1.85314300 |
| C | 2.52144900  | 1.53553700  | 1.21305100  |
| H | 1.80098400  | 2.22792900  | 1.67038100  |
| H | 3.01986500  | 0.98892800  | 2.01696200  |
| H | 3.27825400  | 2.15964100  | 0.71583300  |
| C | 2.44204300  | -1.60187500 | 1.26884800  |
| H | 2.96635400  | -1.05274300 | 2.05435400  |
| H | 1.68855100  | -2.24210600 | 1.74835900  |
| H | 3.16757900  | -2.27906000 | 0.79498500  |

Transition state

|   |             |             |             |
|---|-------------|-------------|-------------|
| C | -0.63920700 | 0.70861100  | -1.57803900 |
| C | -0.64215500 | -0.68675800 | -1.58466700 |
| C | 1.46530300  | -1.40419800 | -1.12410000 |
| C | 1.78593400  | -0.72120000 | 0.04281700  |
| C | 1.79388400  | 0.70639900  | 0.05276200  |
| H | 1.34776700  | -2.48431600 | -1.09964500 |
| C | 1.48210400  | 1.40868800  | -1.10443200 |
| H | 1.37402900  | 2.48934800  | -1.06572400 |
| C | -1.27457200 | 1.16577200  | -0.31004800 |
| C | -1.28332200 | -1.14875400 | -0.32039100 |
| O | -1.56627600 | -2.28129400 | 0.03543300  |
| O | -1.54397800 | 2.29947300  | 0.05149800  |
| H | -0.64966300 | 1.35336900  | -2.44740900 |
| H | -0.66073500 | -1.32151800 | -2.46130200 |
| N | -1.53266500 | 0.00405000  | 0.43640100  |

|   |             |             |             |
|---|-------------|-------------|-------------|
| C | -2.17628700 | -0.00922300 | 1.73791400  |
| H | -3.13682200 | -0.53096900 | 1.68258900  |
| H | -1.54629700 | -0.52072500 | 2.47283100  |
| H | -2.33437700 | 1.02787500  | 2.03955000  |
| H | 1.69566200  | -0.99268700 | -2.09949400 |
| H | 1.70431700  | 1.00708500  | -2.08574000 |
| C | 1.92625100  | 1.45239900  | 1.36364400  |
| H | 1.83375000  | 2.53129700  | 1.21376300  |
| H | 1.16598400  | 1.14973500  | 2.09479900  |
| H | 2.90407600  | 1.26037500  | 1.82483700  |
| C | 1.90778000  | -1.48606600 | 1.34352600  |
| H | 2.88257500  | -1.30296300 | 1.81447800  |
| H | 1.14332400  | -1.19123500 | 2.07393500  |
| H | 1.81281700  | -2.56246900 | 1.17834900  |

#### System 11 (M06-2X/6-31+G(d))

##### Reactant

|   |             |             |             |
|---|-------------|-------------|-------------|
| C | -0.65931000 | 0.66661600  | -1.42049200 |
| C | -0.65949900 | -0.66677800 | -1.42032200 |
| C | 2.03808500  | -1.17655800 | 0.13929200  |
| C | 1.39099200  | -0.73283400 | 1.23899100  |
| C | 1.39121700  | 0.73278900  | 1.23877300  |
| H | 2.20556900  | -2.21164700 | -0.13796100 |
| H | 0.92864300  | -1.34770300 | 2.00424900  |
| H | 0.92905500  | 1.34802600  | 2.00384900  |
| C | 2.03844300  | 1.17598800  | 0.13894200  |
| C | 2.54886500  | -0.00047900 | -0.64319300 |
| H | 2.20624200  | 2.21094400  | -0.13861800 |
| H | 3.64899800  | -0.00064800 | -0.67375000 |
| H | 2.21582900  | -0.00058600 | -1.68970200 |
| C | -1.32058200 | 1.12355600  | -0.16720800 |



|   |             |             |             |
|---|-------------|-------------|-------------|
| C | -1.32090000 | -1.12321700 | -0.16692200 |
| O | -1.56840500 | -2.22806600 | 0.21436400  |
| O | -1.67952500 | 0.00031200  | 0.55416100  |
| O | -1.56777300 | 2.22857200  | 0.21379700  |
| H | -0.28272000 | 1.36578000  | -2.15594300 |
| H | -0.28310300 | -1.36622400 | -2.15560300 |

Product

|   |             |             |             |
|---|-------------|-------------|-------------|
| C | 0.05686000  | 0.76877500  | -0.90858300 |
| C | 0.05663000  | -0.76903900 | -0.90836600 |
| C | 1.42186200  | -1.13019600 | -0.21694300 |
| C | 1.31335300  | -0.66988300 | 1.22688300  |
| C | 1.31354500  | 0.66981100  | 1.22670600  |
| H | 1.73429800  | -2.16066800 | -0.38242200 |
| H | 1.15330600  | -1.32793500 | 2.07470700  |
| H | 1.15369000  | 1.32813400  | 2.07435700  |
| C | 1.42219100  | 1.12971400  | -0.21724000 |
| C | 2.29297400  | -0.00044500 | -0.80591400 |
| H | 1.73493000  | 2.16005200  | -0.38298500 |
| H | 3.30807700  | -0.00054000 | -0.40053400 |
| H | 2.32420000  | -0.00059000 | -1.90120900 |
| C | -1.15840700 | 1.14182500  | -0.09306600 |
| C | -1.15873800 | -1.14149000 | -0.09272700 |
| O | -1.57175600 | -2.22532000 | 0.19545100  |
| O | -1.79937500 | 0.00032500  | 0.34273600  |
| O | -1.57111400 | 2.22586100  | 0.19478200  |
| H | -0.01530300 | 1.22313000  | -1.89968300 |
| H | -0.01569400 | -1.22365300 | -1.89933500 |

Transition state

|   |             |            |             |
|---|-------------|------------|-------------|
| C | -0.26181600 | 0.69456100 | -1.12987300 |
|---|-------------|------------|-------------|

|   |             |             |             |
|---|-------------|-------------|-------------|
| C | -0.26181500 | -0.69456000 | -1.12987300 |
| C | 1.60271700  | -1.15439900 | -0.00558400 |
| C | 1.22835300  | -0.70188600 | 1.26197100  |
| C | 1.22835200  | 0.70188500  | 1.26197200  |
| H | 1.76806600  | -2.19588400 | -0.26100900 |
| H | 0.87261200  | -1.32918500 | 2.07228400  |
| H | 0.87261100  | 1.32918300  | 2.07228600  |
| C | 1.60271600  | 1.15440100  | -0.00558300 |
| C | 2.25961500  | 0.00000100  | -0.71377200 |
| H | 1.76806400  | 2.19588600  | -0.26100700 |
| H | 3.32553200  | 0.00000200  | -0.43516100 |
| H | 2.19350500  | 0.00000200  | -1.80259300 |
| C | -1.25339700 | 1.13072900  | -0.12661800 |
| C | -1.25339600 | -1.13072900 | -0.12661800 |
| O | -1.64886700 | -2.22476100 | 0.16237700  |
| O | -1.72491500 | -0.00000100 | 0.52295600  |
| O | -1.64887000 | 2.22475900  | 0.16237700  |
| H | 0.01643000  | 1.35393000  | -1.94130100 |
| H | 0.01643100  | -1.35392900 | -1.94130100 |

### System 12 (B3LYP/6-31+G(d))

#### Reactant

|   |             |             |             |
|---|-------------|-------------|-------------|
| C | 0.47376400  | -1.13959900 | 0.30657100  |
| C | 0.99872800  | 2.34620600  | 1.04026000  |
| C | -0.99045900 | 2.56906700  | -0.21065600 |
| C | -0.62341100 | -1.04745700 | -0.45635400 |
| C | -0.49751400 | 2.41920800  | 1.20500700  |
| H | -0.79801200 | 3.27090100  | 1.83587000  |
| H | -0.90878400 | 1.52200300  | 1.69275900  |
| C | 1.30658800  | 2.44787700  | -0.27384200 |
| C | 0.06986700  | 2.58452300  | -1.05184900 |

|   |             |             |             |
|---|-------------|-------------|-------------|
| H | 1.69491300  | 2.23551900  | 1.86463400  |
| H | -2.03671200 | 2.65637900  | -0.48329000 |
| H | 0.03238700  | 2.67846700  | -2.13261600 |
| H | 2.30214300  | 2.42789200  | -0.70583200 |
| H | 0.40191000  | -1.20091700 | 1.38812800  |
| H | -0.55075100 | -0.99692600 | -1.53820400 |
| C | 1.82811500  | -1.16913700 | -0.30058700 |
| O | 2.07889300  | -1.05693800 | -1.48580000 |
| C | -1.97667300 | -1.02113200 | 0.15219400  |
| O | -2.21855800 | -0.95365200 | 1.34420000  |
| O | 2.77147900  | -1.35046300 | 0.65135100  |
| O | -2.93159100 | -1.08665000 | -0.80134600 |
| C | 4.13179200  | -1.40353500 | 0.18551600  |
| H | 4.73648400  | -1.56640100 | 1.07791400  |
| H | 4.25849000  | -2.22519600 | -0.52459800 |
| H | 4.40306700  | -0.46217200 | -0.30012300 |
| C | -4.29232400 | -1.08466800 | -0.33215900 |
| H | -4.90688200 | -1.14840100 | -1.23028400 |
| H | -4.46949800 | -1.94320800 | 0.32120400  |
| H | -4.50285000 | -0.16331500 | 0.21764200  |

Product

|   |             |             |             |
|---|-------------|-------------|-------------|
| C | 0.56142900  | -0.05630400 | 0.52080800  |
| C | 0.94262300  | 1.42361200  | 0.93349700  |
| C | -0.94293500 | 1.70257400  | -0.27509200 |
| C | -0.70511900 | 0.13165900  | -0.35563100 |
| C | -0.47697100 | 1.98898900  | 1.17224600  |
| H | -0.46833600 | 3.05854200  | 1.40530100  |
| H | -1.04295200 | 1.44410600  | 1.93570400  |
| C | 1.32220700  | 2.16229000  | -0.34304700 |
| C | 0.20019700  | 2.32503000  | -1.06236100 |

|   |             |             |             |
|---|-------------|-------------|-------------|
| H | 1.65451300  | 1.47061700  | 1.75870400  |
| H | -1.95188200 | 2.00806500  | -0.56004500 |
| H | 0.11381900  | 2.71569300  | -2.07165500 |
| H | 2.33720200  | 2.40156700  | -0.64500700 |
| H | 0.30468200  | -0.60657600 | 1.43305300  |
| H | -0.53100400 | -0.17259800 | -1.38936100 |
| C | 1.67504000  | -0.81899400 | -0.16666500 |
| O | 1.62991600  | -1.31514500 | -1.27478700 |
| C | -1.90869600 | -0.63041400 | 0.16223000  |
| O | -2.06308500 | -1.05001300 | 1.29412300  |
| O | 2.76585800  | -0.89762800 | 0.63138800  |
| O | -2.84423300 | -0.76319800 | -0.80438000 |
| C | 3.88950800  | -1.62265800 | 0.09708300  |
| H | 4.65566900  | -1.57899000 | 0.87179100  |
| H | 3.60914300  | -2.65869600 | -0.11117900 |
| H | 4.24346800  | -1.15278700 | -0.82448700 |
| C | -4.05884200 | -1.43682900 | -0.42382100 |
| H | -4.67413200 | -1.45114300 | -1.32385900 |
| H | -3.83966500 | -2.45415600 | -0.08908700 |
| H | -4.56136700 | -0.89243200 | 0.38037400  |

Transition state

|   |             |             |             |
|---|-------------|-------------|-------------|
| C | 0.52461900  | -0.44777100 | 0.41910200  |
| C | 0.97684800  | 1.67461400  | 0.90925900  |
| C | -0.97716600 | 1.87439100  | -0.30758500 |
| C | -0.63385800 | -0.32575800 | -0.36888200 |
| C | -0.49765600 | 1.91551600  | 1.12409100  |
| H | -0.62817300 | 2.94405000  | 1.50197900  |
| H | -1.00305900 | 1.23652900  | 1.81243200  |
| C | 1.28814000  | 2.15605000  | -0.37508000 |
| C | 0.10424300  | 2.27005300  | -1.11425100 |

|   |             |             |             |
|---|-------------|-------------|-------------|
| H | 1.69184200  | 1.58792300  | 1.72116200  |
| H | -2.01900600 | 1.98067900  | -0.59338900 |
| H | 0.04653400  | 2.49682500  | -2.17370800 |
| H | 2.28798400  | 2.27723500  | -0.77710700 |
| H | 0.42141600  | -0.73945100 | 1.45891300  |
| H | -0.53953600 | -0.42356800 | -1.44369800 |
| C | 1.79645900  | -0.81207200 | -0.23487500 |
| O | 2.02854700  | -0.75462800 | -1.43118800 |
| C | -1.94201600 | -0.71101800 | 0.19942100  |
| O | -2.20852700 | -0.81668700 | 1.38687800  |
| O | 2.71813600  | -1.22366200 | 0.67576500  |
| O | -2.85571700 | -0.93390000 | -0.77969600 |
| C | 3.99467500  | -1.61343300 | 0.14284800  |
| H | 4.58540800  | -1.92412600 | 1.00548700  |
| H | 3.87870300  | -2.44067600 | -0.56287900 |
| H | 4.47151200  | -0.77175400 | -0.36776300 |
| C | -4.16510600 | -1.33120100 | -0.33821500 |
| H | -4.74571000 | -1.47388500 | -1.25032400 |
| H | -4.10983200 | -2.26190300 | 0.23311500  |
| H | -4.61269700 | -0.55308500 | 0.28670100  |

### System 13 (MPW1PW91/6-31+G(d))

#### Reactant

|   |             |             |             |
|---|-------------|-------------|-------------|
| C | -1.81077700 | 0.02875700  | -0.21926600 |
| O | -2.20213500 | -0.78870400 | -1.32936200 |
| O | -0.79742100 | -0.82889500 | -0.75317800 |
| C | -2.38606700 | -0.37910600 | 1.14939300  |
| C | -1.64933900 | 1.53043300  | -0.51851200 |
| H | -2.44625000 | -1.50030300 | 1.22267100  |
| H | -1.21174100 | 1.67360600  | -1.54518100 |
| H | -1.72831500 | 0.01478800  | 1.97636700  |

|   |             |             |             |
|---|-------------|-------------|-------------|
| H | -3.41656500 | 0.06049400  | 1.28082800  |
| H | -2.65270100 | 2.04322600  | -0.46467000 |
| H | -0.97139600 | 2.00578400  | 0.24701900  |
| C | 2.29054600  | 0.09950800  | 0.54589700  |
| C | 1.75539100  | -0.32638200 | 1.73332400  |
| H | 1.66087200  | -1.41637000 | 1.97521100  |
| H | 1.38987300  | 0.39962200  | 2.50489400  |
| C | 2.79904600  | -0.88415200 | -0.52874900 |
| C | 2.42547000  | 1.59611900  | 0.19373000  |
| H | 2.67376500  | -1.95775800 | -0.20804900 |
| H | 2.23996900  | -0.73521400 | -1.50054000 |
| H | 3.89363600  | -0.70247800 | -0.75089500 |
| H | 3.50814100  | 1.86720100  | 0.00742900  |
| H | 1.86425000  | 1.83381800  | -0.75939300 |
| H | 2.02939900  | 2.25910500  | 1.01542200  |

Product

|   |             |             |             |
|---|-------------|-------------|-------------|
| C | -2.88886200 | -0.02271000 | -0.64956700 |
| O | -3.38244200 | -0.75386500 | -1.53066800 |
| O | 0.88179100  | 0.07675100  | 0.95683900  |
| C | -2.86957800 | -0.44178400 | 0.83857300  |
| C | -2.25745500 | 1.34736600  | -0.99034000 |
| H | -3.37438400 | -1.43767200 | 0.97551900  |
| H | -2.28544300 | 1.53098300  | -2.09974700 |
| H | -1.80024900 | -0.49889600 | 1.19862900  |
| H | -3.38868000 | 0.33915900  | 1.46852500  |
| H | -2.81776800 | 2.17049900  | -0.45619100 |
| H | -1.19144100 | 1.38057400  | -0.61922700 |
| C | 2.28770600  | 0.11795200  | 0.50555200  |
| C | 1.92493000  | -0.48498100 | 1.83214300  |
| H | 1.88921900  | -1.59990700 | 1.94556500  |

|   |            |             |             |
|---|------------|-------------|-------------|
| H | 2.10574000 | 0.09447800  | 2.77488200  |
| C | 2.59810000 | -0.80415900 | -0.69675500 |
| C | 2.89752100 | 1.53821000  | 0.45005600  |
| H | 2.08667900 | -1.80208200 | -0.58082400 |
| H | 2.24477100 | -0.32876000 | -1.65883800 |
| H | 3.71053300 | -0.97816800 | -0.78278200 |
| H | 4.02493900 | 1.48188000  | 0.41959600  |
| H | 2.55098300 | 2.07912200  | -0.47935300 |
| H | 2.59270800 | 2.14235900  | 1.35169800  |

Transition state

|   |             |             |             |
|---|-------------|-------------|-------------|
| C | -1.59709300 | 0.00142200  | -0.18304400 |
| O | -1.89347700 | -0.79776400 | -1.26355600 |
| O | -0.28766900 | -0.68494700 | -0.32658300 |
| C | -2.33842800 | -0.36350900 | 1.13642900  |
| C | -1.52808200 | 1.52640900  | -0.47839300 |
| H | -2.26544800 | -1.47267100 | 1.32015200  |
| H | -0.92924900 | 1.70653300  | -1.41522600 |
| H | -1.92228100 | 0.19261000  | 2.02525900  |
| H | -3.42744000 | -0.08320000 | 1.03441900  |
| H | -2.57513100 | 1.91950700  | -0.63510100 |
| H | -1.06873900 | 2.09919300  | 0.37777000  |
| C | 1.87265000  | -0.02479500 | 0.28889800  |
| C | 1.03753100  | -0.60431100 | 1.25700400  |
| H | 1.04304000  | -1.70615100 | 1.43621600  |
| H | 0.52014700  | 0.03320800  | 2.01571100  |
| C | 2.68144200  | -0.89216400 | -0.68209400 |
| C | 2.04321900  | 1.49324200  | 0.16387200  |
| H | 2.45313300  | -1.98763700 | -0.56234400 |
| H | 2.47354700  | -0.58736200 | -1.74978000 |
| H | 3.78733200  | -0.73007800 | -0.50527400 |

|   |            |            |             |
|---|------------|------------|-------------|
| H | 3.12930900 | 1.75947700 | 0.33673100  |
| H | 1.78770900 | 1.84095800 | -0.88007000 |
| H | 1.41581100 | 2.05953200 | 0.90661900  |

System 14 ( $\omega$ b97X-D/6-311+G(d,p))

Reactant

|   |             |             |             |
|---|-------------|-------------|-------------|
| C | -2.41042000 | 0.92311900  | -0.28843100 |
| O | -3.00254000 | 1.11963100  | 0.96138700  |
| O | -1.55906800 | 1.31223800  | 0.74411300  |
| C | -2.71261800 | 1.96272800  | -1.32679300 |
| C | -2.29358300 | -0.50107100 | -0.74405400 |
| H | -2.74912300 | 2.95148800  | -0.86993500 |
| H | -2.05145700 | -1.14740900 | 0.09929300  |
| H | -1.94079600 | 1.94571100  | -2.09875200 |
| H | -3.67349500 | 1.74311000  | -1.79789300 |
| H | -3.23629500 | -0.82211800 | -1.19324900 |
| H | -1.50861600 | -0.58131000 | -1.49857500 |
| C | 1.12200100  | 0.44558000  | -1.51645200 |
| C | 0.93448200  | 1.76306200  | -1.45510400 |
| H | 0.93817600  | -0.06043100 | -2.46232600 |
| H | 1.07017400  | 2.33097300  | -0.54062100 |
| H | 0.62486400  | 2.31908800  | -2.33252100 |
| C | 1.54399200  | -0.43559100 | -0.41117100 |
| C | 1.39783400  | -1.81893700 | -0.55262700 |
| C | 1.77869900  | -2.68767000 | 0.46408000  |
| C | 2.32100400  | -2.18546100 | 1.64140500  |
| C | 2.47939100  | -0.80970900 | 1.79253900  |
| C | 2.09724000  | 0.05573200  | 0.77718900  |
| H | 0.97763900  | -2.21763900 | -1.47085100 |
| H | 1.65416100  | -3.75691200 | 0.33428200  |
| H | 2.62394300  | -2.85948100 | 2.43467400  |



H 2.90994800 -0.41057900 2.70420200

H 2.24370600 1.12222700 0.90688800

Product

C -3.15527400 1.03655400 -0.32728400

O -3.33477600 1.21566900 0.86046000

O -0.14161900 1.42184500 -0.26841200

C -3.20838100 2.16241100 -1.32339300

C -2.91025300 -0.34583900 -0.88048000

H -3.51706600 3.09107700 -0.84505400

H -2.36538200 -0.95343300 -0.15749800

H -2.21238000 2.28419200 -1.75824200

H -3.89217700 1.91058500 -2.13909800

H -3.88497800 -0.81282000 -1.05793700

H -2.38042500 -0.31722500 -1.83330800

C 0.54436800 0.34477900 -0.90777500

C 0.90814600 1.73986600 -1.17696200

H -0.04829100 -0.16547900 -1.66327400

H 1.80497500 2.14884400 -0.71917500

H 0.59205400 2.20478300 -2.10675700

C 1.36162600 -0.55462900 -0.04785100

C 1.49266600 -1.89709800 -0.39791000

C 2.26254300 -2.75718300 0.37889200

C 2.90222600 -2.28113100 1.51751100

C 2.76608900 -0.94254800 1.87764600

C 1.99886500 -0.08409600 1.10125500

H 0.98833100 -2.27298900 -1.28259100

H 2.35700100 -3.79963600 0.09652300

H 3.50030600 -2.94981100 2.12616400

H 3.25679900 -0.56805100 2.76899300

H 1.88506600 0.95420400 1.39387300

Transition state

|   |             |             |             |
|---|-------------|-------------|-------------|
| C | -2.58393000 | 0.33599500  | -0.38586000 |
| O | -2.59107000 | 0.17476900  | -1.72308100 |
| O | -1.43505600 | -0.51830500 | -0.51043500 |
| C | -3.73730000 | -0.30833200 | 0.35935900  |
| C | -2.24003700 | 1.73277300  | 0.09876400  |
| H | -3.88110500 | -1.33158200 | 0.00923600  |
| H | -1.34237200 | 2.08891300  | -0.40890900 |
| H | -3.56498100 | -0.31139300 | 1.43850300  |
| H | -4.64811000 | 0.26463000  | 0.16783300  |
| H | -3.07108400 | 2.40430600  | -0.13229600 |
| H | -2.08135200 | 1.75527200  | 1.17939100  |
| C | 0.06310600  | -0.47462300 | 1.19244900  |
| C | -0.73109900 | -1.57236400 | 1.03610000  |
| H | -0.29668400 | 0.31377200  | 1.84722400  |
| H | -0.41694700 | -2.43886600 | 0.46946600  |
| H | -1.61914000 | -1.68894700 | 1.64245800  |
| C | 1.35406500  | -0.22575400 | 0.56460700  |
| C | 1.97998200  | 1.00566700  | 0.79548400  |
| C | 3.20500200  | 1.29997600  | 0.21222800  |
| C | 3.82132800  | 0.36598300  | -0.61327300 |
| C | 3.20913200  | -0.86352700 | -0.85073100 |
| C | 1.98734200  | -1.15938000 | -0.26770900 |
| H | 1.49692000  | 1.73583800  | 1.43653700  |
| H | 3.67686900  | 2.25743600  | 0.39956000  |
| H | 4.77712800  | 0.59269100  | -1.07166300 |
| H | 3.68856700  | -1.59234800 | -1.49384200 |
| H | 1.52576200  | -2.11991600 | -0.46387400 |

## System 15 ( $\omega$ B97X-D/6-31G(d))

### Reactant

|   |             |             |             |
|---|-------------|-------------|-------------|
| C | -0.37836200 | 0.77399700  | -1.02010300 |
| C | 0.92278900  | 0.50564700  | -0.82186100 |
| H | 1.60605200  | 0.83238600  | -1.60668100 |
| C | 1.59143100  | -0.04805400 | 0.36413300  |
| C | -1.51790500 | 0.59330700  | -0.10960100 |
| H | -0.62644000 | 1.29281700  | -1.94682200 |
| H | -2.12125600 | 1.49153900  | 0.03269000  |
| H | 2.42689300  | 0.55362100  | 0.72616900  |
| C | -1.91337000 | -0.52622800 | 0.49674100  |
| C | 1.33185000  | -1.19596600 | 0.99047300  |
| H | -1.41595000 | -1.47591100 | 0.33973000  |
| H | -2.78377300 | -0.53123500 | 1.14637400  |
| H | 0.57359400  | -1.88678900 | 0.64141400  |
| H | 1.90707000  | -1.49930200 | 1.86040900  |

### Product

|   |             |             |             |
|---|-------------|-------------|-------------|
| C | -0.39909200 | 0.86855900  | -1.05250600 |
| C | 1.00016000  | 0.80382900  | -0.61344700 |
| H | 1.71262900  | 1.50665700  | -1.03701900 |
| C | 1.39233600  | -0.11782700 | 0.27435600  |
| C | -1.35464500 | 0.21974000  | -0.37622500 |
| H | -0.64458800 | 1.46763500  | -1.92534400 |
| H | -2.39624000 | 0.29092400  | -0.67873400 |
| H | 2.43353200  | -0.19014500 | 0.57798100  |
| C | -1.01261300 | -0.55731400 | 0.87141000  |
| C | 0.40856500  | -1.12998300 | 0.80846200  |
| H | -1.73436800 | -1.36385100 | 1.03786200  |
| H | -1.09913300 | 0.11930800  | 1.73668700  |
| H | 0.42234800  | -2.01068100 | 0.14649500  |

H 0.71348300 -1.48433400 1.79871700

Transition state

C 0.69919400 1.23279800 0.16225900  
C -0.69968300 1.23264200 0.16189100  
H -1.17233800 2.21220200 0.11517800  
C -1.47374500 0.12345300 -0.19348200  
C 1.47367200 0.12396500 -0.19332700  
H 1.17166100 2.21248100 0.11633900  
H 2.31242200 0.32639800 -0.86072600  
H -2.31222900 0.32543000 -0.86134900  
C 1.13686600 -1.20083600 0.06166800  
C -1.13645200 -1.20110000 0.06218500  
H 0.92986300 -1.49101700 1.07869700  
H 1.63166800 -1.97970000 -0.51762700  
H -0.92948100 -1.49089200 1.07931600  
H -1.63067700 -1.98042800 -0.51698900

System 16 ( $\omega$ B97X-D/6-311+G(2df,p))

Reactant

C -0.01541300 -0.19656100 -0.11229900  
H 0.90710200 -0.40030600 -0.64404000  
H -0.84363400 -0.07152400 -0.80040000  
H -0.22602700 -0.97194000 0.61548000  
Br 0.21216100 1.47901700 0.85396600  
Cl -0.46883500 -3.22880800 -1.86481700

Product

C -0.19133300 -1.33253300 -0.77018700  
H 0.76908100 -0.91020300 -1.04804600

|    |             |             |             |
|----|-------------|-------------|-------------|
| H  | -1.00059900 | -0.66623200 | -1.05146000 |
| H  | -0.22332800 | -1.54943800 | 0.29278200  |
| Br | 0.28631100  | 2.01179300  | 1.16411600  |
| Cl | -0.40232300 | -2.87667500 | -1.66253300 |

Transition state

|    |             |             |             |
|----|-------------|-------------|-------------|
| C  | -0.75780300 | -0.00003100 | 0.00090100  |
| H  | -0.76194900 | -0.92747300 | -0.53965900 |
| H  | -0.76194700 | 0.93191900  | -0.53184900 |
| H  | -0.76195800 | -0.00454100 | 1.07438900  |
| Br | 1.70218600  | 0.00000400  | -0.00011500 |
| Cl | -3.10257800 | 0.00000900  | -0.00025000 |

System 17 ( $\omega$ B97X-D/TZVP)

Reactant

|    |             |             |             |
|----|-------------|-------------|-------------|
| N  | -1.36926100 | -0.81437300 | -0.51830800 |
| N  | -2.46668000 | -0.68143500 | -0.61542800 |
| Ti | 1.18275100  | 0.75772300  | 0.46968200  |
| O  | -0.18727700 | -0.96189200 | -0.41541200 |

Product

|    |             |             |             |
|----|-------------|-------------|-------------|
| N  | -1.33912900 | -0.02596100 | -0.22304800 |
| N  | -2.39067800 | -0.32047900 | -0.43277000 |
| Ti | 0.59083600  | 0.40572900  | 0.27580500  |
| O  | 1.44920800  | -0.88569600 | -0.17636000 |

Transition state

|    |             |             |            |
|----|-------------|-------------|------------|
| N  | -1.17969800 | -0.81658100 | 0.00000000 |
| N  | -2.28587300 | -0.70615100 | 0.00000000 |
| Ti | 1.10268200  | 0.87621400  | 0.00000000 |
| O  | 0.00000000  | -1.07719900 | 0.00000000 |

## System 18 (B3LYP/6-31G(d))

### Reactant

|   |             |             |             |
|---|-------------|-------------|-------------|
| C | -0.67450700 | 0.74846600  | 0.23886400  |
| C | 0.66371600  | 0.77671600  | 0.16852800  |
| H | 1.40733700  | 1.55281000  | 0.33186500  |
| C | 0.79013500  | -0.68459600 | -0.22529700 |
| C | -0.78022500 | -0.71612200 | -0.14884900 |
| H | -1.42888200 | 1.49274600  | 0.48163300  |
| H | -1.19204700 | -1.38834900 | 0.61411000  |
| H | -1.28238800 | -0.92427700 | -1.10179500 |
| H | 1.29836200  | -1.33354100 | 0.49870600  |
| H | 1.20810300  | -0.88136100 | -1.22037400 |

### Product

|   |             |             |             |
|---|-------------|-------------|-------------|
| C | -0.72037800 | 0.47510800  | 0.29567800  |
| C | 0.71303900  | 0.56867900  | -0.01688200 |
| H | 1.11353200  | 1.57908200  | -0.10739200 |
| C | 1.54703700  | -0.46793900 | -0.16807700 |
| C | -1.54016000 | -0.50969900 | -0.09305200 |
| H | -1.13379500 | 1.30046800  | 0.87651200  |
| H | -2.58768700 | -0.52297300 | 0.19389900  |
| H | -1.19412000 | -1.32752500 | -0.72031900 |
| H | 1.21394200  | -1.49405700 | -0.03329300 |
| H | 2.59363400  | -0.32262800 | -0.41976600 |

### Transition state

|   |             |             |             |
|---|-------------|-------------|-------------|
| C | -0.68438900 | 0.73294100  | 0.08313500  |
| C | 0.68283500  | 0.73384800  | -0.08307200 |
| H | 1.33835700  | 1.54203700  | -0.40460300 |
| C | 1.06551200  | -0.62491000 | 0.11923000  |

|   |             |             |             |
|---|-------------|-------------|-------------|
| C | -1.06412200 | -0.62656300 | -0.11914700 |
| H | -1.34147700 | 1.54019600  | 0.40390200  |
| H | -1.88065900 | -1.10106100 | 0.43636900  |
| H | -0.87055300 | -1.08763700 | -1.08058100 |
| H | 0.87341400  | -1.08608600 | 1.08078300  |
| H | 1.88189800  | -1.09934200 | -0.43675100 |

### System 19 (MPW1PW91/6-31+G(d,p))

#### Reactant

|   |             |             |             |
|---|-------------|-------------|-------------|
| C | 0.83799400  | -0.16470400 | 2.75798100  |
| C | 1.20055200  | 0.18860200  | 1.23850600  |
| C | -1.10823000 | 0.18547800  | 1.22558500  |
| C | -0.75849100 | -0.16900500 | 2.74882700  |
| H | 1.27781200  | -1.15313800 | 3.07479200  |
| H | 1.24093500  | 0.62983700  | 3.45231200  |
| H | -1.19625600 | -1.16010400 | 3.05993300  |
| H | -1.17339000 | 0.62237400  | 3.43959100  |
| C | 0.04633800  | 1.21535200  | 0.90188900  |
| H | 0.05045600  | 1.54677700  | -0.17611200 |
| H | 0.04142200  | 2.11831800  | 1.58228400  |
| C | 0.73825300  | -1.03610300 | 0.39369800  |
| H | 1.41272000  | -1.83661900 | -0.00105500 |
| C | -0.63460800 | -1.03647700 | 0.38522800  |
| H | -1.30642300 | -1.82832200 | -0.02903000 |
| H | 2.26086700  | 0.53287400  | 1.08129800  |
| H | -2.16719300 | 0.52575000  | 1.05586200  |
| C | 1.14079700  | 0.24887400  | -3.21929300 |
| H | 1.69402400  | -0.07761800 | -2.31260800 |
| H | 1.60532100  | 0.58180800  | -4.17173000 |
| N | -1.34036500 | 0.21759500  | -3.08296000 |
| N | -0.18221600 | 0.23301400  | -3.15304700 |

Product

|   |             |             |             |
|---|-------------|-------------|-------------|
| C | 0.85201900  | -0.32051200 | 2.17489300  |
| C | 1.18378000  | 0.37211300  | 0.79358400  |
| C | -1.13666500 | 0.33826600  | 0.81915200  |
| C | -0.74774700 | -0.36205200 | 2.18371500  |
| H | 1.31608900  | -1.34658100 | 2.25748100  |
| H | 1.24716900  | 0.29672800  | 3.03359400  |
| H | -1.15776300 | -1.41173300 | 2.25404400  |
| H | -1.16598200 | 0.21912400  | 3.05605000  |
| C | 0.00544900  | 1.41830100  | 0.67910200  |
| H | -0.02176800 | 1.97903500  | -0.30029700 |
| H | 0.00356600  | 2.16895800  | 1.52272300  |
| C | 0.83064800  | -0.65385100 | -0.35949700 |
| H | 1.28195600  | -1.66913900 | -0.16886300 |
| C | -0.76179700 | -0.66100500 | -0.34319400 |
| H | -1.25438100 | -1.66873500 | -0.21743800 |
| H | 2.23053900  | 0.78668200  | 0.72595900  |
| H | -2.19845200 | 0.70831300  | 0.76400200  |
| C | 1.12498800  | -0.15585400 | -1.81856100 |
| H | 1.73558400  | 0.79379100  | -1.86661400 |
| H | 1.63944100  | -0.91780500 | -2.47342400 |
| N | -1.19471700 | -0.11966000 | -1.69774000 |
| N | -0.22587900 | 0.14515100  | -2.45882900 |

Transition state

|   |            |             |             |
|---|------------|-------------|-------------|
| C | 2.28239400 | 0.85213300  | -0.24139800 |
| C | 0.80677100 | 1.14662400  | 0.29526500  |
| C | 0.89455000 | -1.16322000 | 0.26433300  |
| C | 2.34944900 | -0.74560500 | -0.25012900 |
| H | 2.45403500 | 1.30363500  | -1.26086200 |



|   |             |             |             |
|---|-------------|-------------|-------------|
| H | 3.05356700  | 1.28920900  | 0.45959500  |
| H | 2.56981000  | -1.16918700 | -1.27180600 |
| H | 3.14587000  | -1.12398400 | 0.45746400  |
| C | 0.64176600  | -0.03020600 | 1.33401600  |
| H | -0.38058700 | -0.08078600 | 1.80777700  |
| H | 1.42623000  | -0.01032300 | 2.14720300  |
| C | -0.16688000 | 0.67789300  | -0.83478600 |
| H | -0.37109200 | 1.30877000  | -1.73620400 |
| C | -0.09381200 | -0.73425600 | -0.86005600 |
| H | -0.31871900 | -1.37451600 | -1.74816600 |
| H | 0.65450500  | 2.19500400  | 0.67950500  |
| H | 0.81158300  | -2.22862800 | 0.61867200  |
| C | -2.30050300 | 1.14240500  | 0.00281200  |
| H | -2.19296100 | 1.68738800  | 0.97651700  |
| H | -2.90403600 | 1.66146000  | -0.78598400 |
| N | -2.28022900 | -1.29370100 | 0.04195500  |
| N | -2.63843000 | -0.18239200 | 0.15746600  |

### System 20 ( $\omega$ B97X-D/6-31+G(d,p))

#### Reactant

|   |             |             |             |
|---|-------------|-------------|-------------|
| C | 2.06793300  | 0.72765300  | 1.42212900  |
| H | 1.72582100  | 0.29457900  | 2.36001800  |
| C | 1.73249200  | 0.19591000  | 0.24881200  |
| H | 2.07321300  | 0.65123600  | -0.67940500 |
| C | 0.88538700  | -1.03438300 | 0.09308000  |
| H | 0.51630700  | -1.37929100 | 1.06825800  |
| O | -0.18357500 | -0.83337500 | -0.82485800 |
| C | -1.13957900 | 0.09561500  | -0.48608100 |
| C | -1.57473000 | 0.92853800  | -1.43233000 |
| H | -1.13396600 | 0.91640100  | -2.42248800 |
| H | 1.46947000  | -1.84656200 | -0.34856600 |

|   |             |             |             |
|---|-------------|-------------|-------------|
| H | 2.69972500  | 1.60757100  | 1.48861600  |
| H | -2.39107100 | 1.61229900  | -1.23289400 |
| C | -1.68325800 | 0.03602500  | 0.91348400  |
| H | -0.94130900 | 0.36675400  | 1.64799800  |
| H | -2.55513200 | 0.68611300  | 1.00300800  |
| H | -1.98168100 | -0.98668200 | 1.16814600  |

#### Product

|   |             |             |             |
|---|-------------|-------------|-------------|
| C | 0.84126600  | 1.07611700  | 0.43373200  |
| H | 0.45760100  | 1.00670100  | 1.45808800  |
| C | 1.60755100  | -0.16976900 | 0.08891300  |
| H | 2.00914200  | -0.21714500 | -0.92354400 |
| C | 1.80563600  | -1.19628700 | 0.91447600  |
| H | 1.41838500  | -1.18990500 | 1.93140100  |
| O | -1.71647400 | -0.18166800 | -1.71022100 |
| C | -1.34565600 | 0.25235600  | -0.63803600 |
| C | -0.30371700 | 1.35618400  | -0.55608000 |
| H | 0.08404500  | 1.51613600  | -1.56613700 |
| H | 2.36581800  | -2.07324000 | 0.60640700  |
| H | 1.52006600  | 1.93740600  | 0.41140500  |
| H | -0.82260000 | 2.27491200  | -0.25136000 |
| C | -1.90597500 | -0.27507500 | 0.66396700  |
| H | -1.16016200 | -0.93064300 | 1.12780900  |
| H | -2.11455100 | 0.53703000  | 1.36789500  |
| H | -2.81115700 | -0.85083500 | 0.46920000  |

#### Transition state

|   |            |             |             |
|---|------------|-------------|-------------|
| C | 1.20743600 | 1.13053400  | 0.61519000  |
| H | 0.60634000 | 1.06216500  | 1.51806600  |
| C | 1.80745800 | -0.00126400 | 0.09337000  |
| H | 2.52139000 | 0.11143700  | -0.71808200 |

|   |             |             |             |
|---|-------------|-------------|-------------|
| C | 1.16146200  | -1.23847500 | 0.24327500  |
| H | 0.64213000  | -1.45118900 | 1.17458400  |
| O | -0.34718200 | -1.03907600 | -0.78854200 |
| C | -0.99301000 | 0.00661400  | -0.38232800 |
| C | -0.55112400 | 1.27036100  | -0.73551800 |
| H | 0.07704700  | 1.38216500  | -1.61066700 |
| H | 1.56263900  | -2.11564900 | -0.25159100 |
| H | 1.61413800  | 2.11656100  | 0.41054700  |
| H | -1.09944200 | 2.15089700  | -0.41069600 |
| C | -2.01965700 | -0.19333900 | 0.70470800  |
| H | -1.52793900 | -0.56832900 | 1.61313800  |
| H | -2.54955800 | 0.72945400  | 0.95311900  |
| H | -2.74467500 | -0.95148300 | 0.39773500  |

### System 21 (MN15-L/6-31G(d))

#### Reactant

|   |             |             |             |
|---|-------------|-------------|-------------|
| C | 3.06783500  | -0.21127700 | 1.19487800  |
| C | 1.67843100  | -0.41146400 | 1.21940800  |
| C | 0.99765100  | -0.53495700 | 0.00343900  |
| C | 1.65530200  | -0.46530000 | -1.22942400 |
| C | 3.04478900  | -0.26425900 | -1.23955000 |
| C | 3.75090500  | -0.13774000 | -0.03111000 |
| H | 3.61767500  | -0.11061600 | 2.14042200  |
| H | 1.11899200  | -0.46761500 | 2.16257500  |
| H | 1.07794600  | -0.56214900 | -2.15836300 |
| H | 3.57675900  | -0.20472700 | -2.19869700 |
| H | 4.83776600  | 0.01947200  | -0.04486200 |
| C | -1.28064900 | 0.18182900  | 0.01973800  |
| N | -2.54086200 | -0.29839300 | 0.07684000  |
| C | -2.88170000 | -1.72510400 | 0.03182100  |
| C | -3.67522200 | 0.62839500  | 0.03476500  |

|   |             |             |             |
|---|-------------|-------------|-------------|
| H | -3.57756100 | -1.95351600 | 0.86152100  |
| H | -3.38702400 | -1.95763300 | -0.92741700 |
| H | -1.98326500 | -2.34759400 | 0.13091400  |
| H | -3.58627600 | 1.38587500  | 0.83346100  |
| H | -3.72456700 | 1.14977200  | -0.94096200 |
| H | -4.59578600 | 0.03767300  | 0.18420400  |
| S | -0.87888100 | 1.80786000  | -0.04811300 |
| O | -0.37082900 | -0.83112700 | 0.02323200  |

Product

|   |             |             |             |
|---|-------------|-------------|-------------|
| C | 3.34587600  | 0.26970600  | 1.13751800  |
| C | 1.98960100  | 0.62219100  | 1.23838500  |
| C | 1.13242900  | 0.42033800  | 0.13986100  |
| C | 1.62897700  | -0.13623800 | -1.05639600 |
| C | 2.97929100  | -0.50333500 | -1.14097700 |
| C | 3.84027900  | -0.29656100 | -0.04809200 |
| H | 4.01396400  | 0.43034900  | 1.99474200  |
| H | 1.59138200  | 1.05314300  | 2.16719500  |
| H | 0.94971700  | -0.28849600 | -1.90534800 |
| H | 3.36445900  | -0.94543300 | -2.07012000 |
| H | 4.89977500  | -0.57736400 | -0.12325900 |
| C | -1.44566900 | -0.60098200 | -0.03075900 |
| N | -2.80325500 | -0.48006300 | 0.07851800  |
| C | -3.63449400 | -1.61640600 | -0.32243600 |
| C | -3.49105500 | 0.80140300  | 0.23078900  |
| H | -4.45700100 | -1.73935800 | 0.40768400  |
| H | -4.07314400 | -1.44778600 | -1.32856900 |
| H | -3.01757300 | -2.52708300 | -0.34092800 |
| H | -3.04492900 | 1.39879900  | 1.04657300  |
| H | -3.48067000 | 1.39626100  | -0.70676300 |
| H | -4.54055900 | 0.59066700  | 0.50302900  |

|   |             |             |             |
|---|-------------|-------------|-------------|
| S | -0.55714400 | 0.97571400  | 0.25954200  |
| O | -0.85072400 | -1.63778000 | -0.28784600 |

Transition state

|   |             |             |             |
|---|-------------|-------------|-------------|
| C | 3.12136700  | -0.20614600 | 1.21017100  |
| C | 1.72770200  | -0.03355100 | 1.22826000  |
| C | 1.06103700  | 0.07820500  | -0.00166300 |
| C | 1.72721100  | -0.04311300 | -1.23088400 |
| C | 3.12092800  | -0.21506200 | -1.21196600 |
| C | 3.82983000  | -0.29613100 | -0.00069800 |
| H | 3.65325100  | -0.27285700 | 2.17047700  |
| H | 1.17151200  | 0.04283100  | 2.17078600  |
| H | 1.17044500  | 0.02551700  | -2.17361200 |
| H | 3.65251000  | -0.28862000 | -2.17193600 |
| H | 4.91898100  | -0.43085000 | -0.00039600 |
| C | -1.32672300 | -0.03438500 | 0.01957100  |
| N | -2.63758500 | -0.31721900 | 0.07120900  |
| C | -3.10872900 | -1.70184000 | -0.01640500 |
| C | -3.67219200 | 0.71129100  | -0.02001000 |
| H | -3.86081300 | -1.87511500 | 0.77680000  |
| H | -3.58387300 | -1.87787100 | -1.00293800 |
| H | -2.26380200 | -2.39326500 | 0.11540000  |
| H | -3.28189700 | 1.67883400  | 0.33609700  |
| H | -4.02763200 | 0.81816800  | -1.06541500 |
| H | -4.52447700 | 0.40966300  | 0.61744400  |
| S | -0.62080100 | 1.53405600  | -0.00880300 |
| O | -0.43886000 | -0.96455100 | 0.00142600  |

System 22 (M06-2X/6-31+G(d))

Reactant

|   |            |            |             |
|---|------------|------------|-------------|
| C | 2.38284400 | 0.62291000 | -2.15636100 |
|---|------------|------------|-------------|

|   |             |             |             |
|---|-------------|-------------|-------------|
| C | 1.76892100  | -0.06720000 | -1.05842200 |
| C | 2.19211900  | 0.26894300  | 0.27788900  |
| C | 3.22745600  | 1.25151900  | 0.42804800  |
| C | 3.79212800  | 1.87259500  | -0.64743300 |
| C | 3.35676000  | 1.55838800  | -1.96429000 |
| H | 2.08521300  | 0.37643000  | -3.16923600 |
| H | 3.59456100  | 1.48846400  | 1.42030400  |
| H | 4.58117700  | 2.60481200  | -0.50071400 |
| H | 3.80852700  | 2.05775400  | -2.81612000 |
| C | 0.79004300  | -1.05765700 | -1.27059700 |
| C | 0.32279400  | -1.80254400 | -0.16881600 |
| C | 0.70399200  | -1.43087100 | 1.16710300  |
| C | 1.59314700  | -0.35836400 | 1.38806400  |
| C | -0.99314200 | -3.65674100 | 0.73261200  |
| C | -0.64407500 | -3.26905300 | 2.05526700  |
| C | 0.17133000  | -2.19128900 | 2.26034400  |
| C | -0.53393500 | -2.93993000 | -0.33512900 |
| H | -1.63260900 | -4.52014000 | 0.57273800  |
| H | -1.01545100 | -3.83933400 | 2.90202400  |
| H | 0.44845600  | -1.92554400 | 3.27470700  |
| H | -0.81550200 | -3.25126000 | -1.33489100 |
| C | 1.90222000  | 0.06755200  | 2.80390400  |
| C | 0.26058000  | -1.32974700 | -2.65882700 |
| H | -0.75878600 | -1.71904000 | -2.62565300 |
| H | 0.21933300  | -0.41237600 | -3.25076600 |
| H | 0.88308400  | -2.05072900 | -3.20451800 |
| H | 0.98389600  | 0.13179700  | 3.39515600  |
| H | 2.57350900  | -0.64199800 | 3.30418700  |
| H | 2.35739600  | 1.05585600  | 2.84676100  |
| C | -1.43252400 | 1.14556000  | -0.54796400 |
| C | -0.90531000 | 1.54549200  | 0.61724200  |

|   |             |             |             |
|---|-------------|-------------|-------------|
| C | 0.11712300  | 2.61262700  | 0.61970100  |
| O | 0.52940900  | 3.20390600  | -0.35303300 |
| O | 0.53875700  | 2.88124100  | 1.87393400  |
| C | 1.47645200  | 3.95065400  | 1.98000800  |
| H | 1.75847400  | 3.99311100  | 3.03191400  |
| H | 2.34613700  | 3.75782200  | 1.34739300  |
| H | 1.01237600  | 4.89074900  | 1.67012500  |
| C | -4.53568800 | -1.72791600 | -1.16319000 |
| C | -3.89759800 | -1.65732300 | 0.07644600  |
| C | -2.87669600 | -0.73872700 | 0.28929600  |
| C | -2.48019100 | 0.13524600  | -0.73320900 |
| C | -3.11628000 | 0.04296900  | -1.97938600 |
| C | -4.13806400 | -0.87822800 | -2.19457600 |
| H | -5.33226700 | -2.44810600 | -1.32609900 |
| H | -4.18424700 | -2.33430200 | 0.87629900  |
| H | -2.36020200 | -0.72382700 | 1.24645200  |
| H | -2.80663600 | 0.70922500  | -2.78160700 |
| H | -4.62424300 | -0.93112100 | -3.16435700 |
| H | -1.19850400 | 1.13946300  | 1.58074900  |
| H | -1.06845800 | 1.64190600  | -1.44866400 |

Product

|   |            |            |             |
|---|------------|------------|-------------|
| C | 2.51297300 | 0.27861200 | -2.19170100 |
| C | 1.67209200 | 0.00937600 | -1.11744900 |
| C | 2.06121600 | 0.37671300 | 0.17902600  |
| C | 3.28678200 | 0.99539100 | 0.39524000  |
| C | 4.13190100 | 1.25698600 | -0.68632100 |
| C | 3.74338700 | 0.90464200 | -1.97424000 |
| H | 2.22184000 | 0.00849800 | -3.20237600 |
| H | 3.59265000 | 1.28030100 | 1.39793400  |
| H | 5.09018600 | 1.73989600 | -0.51863800 |

|   |             |             |             |
|---|-------------|-------------|-------------|
| H | 4.39676500  | 1.11405900  | -2.81620600 |
| C | 0.29343600  | -0.63001900 | -1.20717000 |
| C | 0.24042600  | -1.74512600 | -0.17997500 |
| C | 0.57408900  | -1.33560300 | 1.11972800  |
| C | 0.99816000  | 0.12353900  | 1.23572400  |
| C | -0.33865500 | -3.93166200 | 0.65753700  |
| C | -0.02231800 | -3.52314000 | 1.94933600  |
| C | 0.43808500  | -2.22350400 | 2.18251800  |
| C | -0.20875800 | -3.04009800 | -0.41018600 |
| H | -0.69614200 | -4.94134800 | 0.47757500  |
| H | -0.12939900 | -4.21352900 | 2.78098200  |
| H | 0.68126800  | -1.91727000 | 3.19552500  |
| H | -0.48161000 | -3.35735000 | -1.41230900 |
| C | 1.42772600  | 0.49570400  | 2.64897300  |
| C | -0.07230000 | -1.06958000 | -2.61687900 |
| H | -1.06297000 | -1.53085600 | -2.64241000 |
| H | -0.09047500 | -0.20887500 | -3.29450500 |
| H | 0.65582400  | -1.79310000 | -2.99981200 |
| H | 0.58962600  | 0.39971200  | 3.34669400  |
| H | 2.23680000  | -0.16363400 | 2.98158300  |
| H | 1.77966600  | 1.52682700  | 2.70764700  |
| C | -0.71961800 | 0.46784900  | -0.66566600 |
| C | -0.26316700 | 0.95263500  | 0.73480800  |
| C | 0.08175000  | 2.43357500  | 0.69474100  |
| O | 0.40278800  | 3.05616400  | -0.28885200 |
| O | 0.02404800  | 2.99136100  | 1.91782400  |
| C | 0.45633200  | 4.35213200  | 1.98350400  |
| H | 0.36740200  | 4.63896100  | 3.03028400  |
| H | 1.49215600  | 4.43381300  | 1.64429600  |
| H | -0.17576900 | 4.98218500  | 1.35415400  |
| C | -4.76284600 | -1.05809100 | -0.97472700 |



|   |             |             |             |
|---|-------------|-------------|-------------|
| C | -3.98346700 | -1.38699300 | 0.13292400  |
| C | -2.69280900 | -0.87804000 | 0.26266200  |
| C | -2.15242400 | -0.02939100 | -0.71269700 |
| C | -2.95444200 | 0.30573700  | -1.80954500 |
| C | -4.24452400 | -0.20381700 | -1.94596500 |
| H | -5.76710800 | -1.45897900 | -1.07673600 |
| H | -4.37660800 | -2.04866100 | 0.89960000  |
| H | -2.09983900 | -1.16581200 | 1.12773600  |
| H | -2.55476000 | 0.96987900  | -2.57328900 |
| H | -4.84368700 | 0.06898900  | -2.81007000 |
| H | -1.05347300 | 0.81727400  | 1.48030100  |
| H | -0.62916500 | 1.31158500  | -1.35709500 |

Transition state

|   |             |            |             |
|---|-------------|------------|-------------|
| C | 1.89988400  | 0.46205300 | 2.69052000  |
| C | 1.17961600  | 0.71081900 | 1.49860500  |
| C | 1.90036000  | 0.95963500 | 0.30304500  |
| C | 3.31424000  | 0.96686900 | 0.33820900  |
| C | 3.99135700  | 0.75648700 | 1.51938600  |
| C | 3.27735900  | 0.49649300 | 2.70433300  |
| H | 1.36340700  | 0.27067700 | 3.61416000  |
| H | 3.87468000  | 1.16475500 | -0.57029300 |
| H | 5.07674900  | 0.78793500 | 1.53607400  |
| H | 3.81363400  | 0.32687100 | 3.63330900  |
| C | -0.26070600 | 0.67258800 | 1.43389800  |
| C | -0.87584300 | 1.48879000 | 0.41847700  |
| C | -0.16748600 | 1.68098500 | -0.79540900 |
| C | 1.14503200  | 1.09282500 | -0.91737300 |
| C | -2.75331900 | 2.73647100 | -0.48974000 |
| C | -2.05483700 | 2.91705900 | -1.69794800 |
| C | -0.79034200 | 2.38498700 | -1.85192500 |

|   |             |             |             |
|---|-------------|-------------|-------------|
| C | -2.18112500 | 2.01959400  | 0.54043000  |
| H | -3.74852100 | 3.15454500  | -0.37042600 |
| H | -2.50773900 | 3.48083200  | -2.50829700 |
| H | -0.25850400 | 2.53788400  | -2.78559600 |
| H | -2.73696400 | 1.87444000  | 1.46115100  |
| C | 1.86742000  | 1.22035000  | -2.23572700 |
| C | -1.03660200 | 0.33633100  | 2.68112700  |
| H | -2.07673100 | 0.09702000  | 2.45049000  |
| H | -0.60773000 | -0.53390300 | 3.18656700  |
| H | -1.02709800 | 1.17585700  | 3.38876800  |
| H | 1.22253100  | 0.92209500  | -3.06673900 |
| H | 2.18144600  | 2.25916500  | -2.40311700 |
| H | 2.75140600  | 0.58392800  | -2.27695500 |
| C | -0.41945300 | -1.22280400 | 0.24059900  |
| C | 0.38772200  | -1.03741800 | -0.89255200 |
| C | 1.71273700  | -1.68262900 | -0.86458300 |
| O | 2.29891800  | -2.04523000 | 0.13256700  |
| O | 2.23236000  | -1.82536800 | -2.10508600 |
| C | 3.52792500  | -2.42077700 | -2.14780800 |
| H | 3.80106800  | -2.45787600 | -3.20179500 |
| H | 4.24309000  | -1.81711400 | -1.58213600 |
| H | 3.49966600  | -3.42623900 | -1.72136100 |
| C | -4.67217500 | -1.73208700 | 0.00919400  |
| C | -4.01722900 | -0.94204500 | -0.93534000 |
| C | -2.63852500 | -0.76392000 | -0.87196600 |
| C | -1.88220900 | -1.37422000 | 0.13987600  |
| C | -2.55499600 | -2.16338800 | 1.08557300  |
| C | -3.93392100 | -2.34326700 | 1.02232300  |
| H | -5.74805200 | -1.87044000 | -0.04404000 |
| H | -4.58291400 | -0.45357400 | -1.72388100 |
| H | -2.14999300 | -0.12743500 | -1.60701700 |

|   |             |             |             |
|---|-------------|-------------|-------------|
| H | -1.98126200 | -2.64722500 | 1.87322300  |
| H | -4.43123200 | -2.96420200 | 1.76202400  |
| H | -0.06207400 | -0.92809000 | -1.87470500 |
| H | 0.05160000  | -1.76380300 | 1.05939100  |

**Values of the external parameter  $\mu$  for the testing reaction set presented in Table 3 of the manuscript.**

**Table S1.** External parameter  $\mu$  in  $E_h$

| No. | $\mu[E_h]$ |
|-----|------------|
| 1   | 0.01172099 |
| 2   | 0.00964619 |
| 3   | 0.01534064 |
| 4   | 0.01460426 |
| 5   | 0.01841486 |
| 6   | 0.00952677 |
| 7   | 0.02154924 |
| 8   | 0.01953110 |
| 9   | 0.00671141 |
| 10  | 0.01044064 |
| 11  | 0.01102385 |
| 12  | 0.01230222 |
| 13  | 0.01557511 |
| 14  | 0.02372702 |
| 15  | 0.02278763 |
| 16  | 0.02092953 |
| 17  | 0.00069965 |
| 18  | 0.06113551 |
| 19  | 0.02342654 |
| 20  | 0.04144491 |
| 21  | 0.01550286 |
| 22  | 0.06592490 |
